1 **The Cx43 Carboxyl-Terminal Mimetic Peptide  $\alpha$ CT1**  
2 **Protects Endothelial Barrier Function in a ZO1 Binding-**  
3 **Competent Manner**

4  
5 **Randy E. Strauss 1,\* Louisa Mezache 5, Rengasayee Veeraraghavan 5,6,7, Robert G. Gourdie 2,3,4,\***

6  
7 1 Virginia Tech, Translational Biology Medicine and Health (TBMH) Program, Roanoke, VA 24016,

8 USA

9 2 Center for Heart and Reparative Medicine Research, Fralin Biomedical Research Institute at

10 Virginia Tech

11 Carilion, Roanoke, VA 24016, USA

12 3 Virginia Tech Carilion School of Medicine, Roanoke, VA 24016, USA

13 4 Department of Biomedical Engineering and Mechanics, Virginia Polytechnic Institute and State

14 University,

15 Blacksburg, VA 24060, USA

16 5 Department of Biomedical Engineering, College of Engineering, The Ohio State University, 460

17 Medical Center Dr., Rm 415A, IBMR, Columbus, OH 43210 USA

18 6 The Frick Center for Heart Failure and Arrhythmia, Davis Heart and Lung Research Institute,

19 College of Medicine, The Ohio State University Wexner Medical Center, Columbus, OH USA

20 7 Department of Physiology and Cell Biology, College of Medicine, The Ohio State University,

21 Columbus, OH USA

22 **\* Correspondence: [gourdier@vtc.vt.edu](mailto:gourdier@vtc.vt.edu) (R.G.G.)**

23

24 1

## 25 **Abstract**

26

27 The Cx43 CT mimetic peptide,  $\alpha$ CT1, originally designed to bind to ZO1 and thereby inhibit  
28 Cx43/ZO1 interaction, was used as a tool to probe the role of Cx43/ZO1 association in regulation  
29 of epithelial/endothelial barrier function. Using both *in vitro* and *ex vivo* methods of barrier  
30 function measurement, including Electric Cell-Substrate Impedance Sensing(ECIS), a FITC-dextran  
31 transwell permeability assay, and a FITC-dextran cardiovascular leakage protocol involving  
32 Langendorff-perfused mouse hearts,  $\alpha$ CT1 was found to protect the endothelium from thrombin-  
33 induced breakdown in cell-cell contacts. Barrier protection was accompanied by significant  
34 remodeling of the F-actin cytoskeleton, characterized by a redistribution of F-actin away from  
35 the cytoplasmic and nuclear regions of the cell, towards the endothelial cell periphery, in  
36 association with alterations in cellular orientation distribution. In line with observations of  
37 increased cortical F-actin,  $\alpha$ CT1 upregulated cell-cell border localization of endothelial VE-  
38 cadherin, the Tight Junction protein Zonula Occludens 1 (ZO1) , and the Gap Junction Protein (GJ)  
39 Connexin43 (Cx43). A ZO1-binding-incompetent variant of  $\alpha$ CT1,  $\alpha$ CT1-I, indicated that these  
40 effects on barrier function and barrier-associated proteins, were likely associated with Cx43 CT  
41 sequences retaining ability to interact with ZO1. These results implicate the Cx43 CT and its  
42 interaction with ZO1, in the regulation of endothelial barrier function, while revealing the  
43 therapeutic potential of  $\alpha$ CT1 in the treatment of vascular edema.

## 44 **Introduction**

45

46 Barrier function is a vital mechanism characterized by the homeostatic exchange of substances  
47 between interior and exterior compartments of epithelial tissues, marked by apical and  
48 basolateral membrane domains, respectively (Zihni, Mills, Matter, & Balda, 2016). Diseases  
49 associated with vascular barrier function disruption occur in the heart and other tissues, the  
50 functions of which critically depend upon a healthy blood circulation. These diseases include  
51 ischemia-reperfusion Injury, coronary artery disease (CAD), stroke, acute respiratory distress  
52 syndrome (ARDS), chronic skin wounds such diabetic foot ulcers as well as many other  
53 pathologies (Aghajanian et al., 2008; Escibano et al., 2019; Herrero, Sanchez, & Lorente, 2017;  
54 Gerd Heusch, 2016; Heusch, 2018; Higashi & Miller, 2017; Simmons, Erfinanda, Bartz, & Kuebler,  
55 2019; Soon, Chua, & Becker, 2016). The vascular endothelial barrier, a specialized epithelial  
56 monolayer lining blood vessels, acts like a semi-permeable filter that regulates the exchange of  
57 cells, extracellular vesicles, plasma proteins, solutes, and fluids between the circulation and  
58 tissue (Aghajanian, Wittchen, Allingham, Garrett, & Burridge, 2008; Komarova & Malik, 2010).  
59 Pathological stress triggers breakdown in these barrier properties, causing characteristic  
60 disruptions in cytoskeletal structure and junctional complexes at cell-cell contacts, including  
61 intercellular gap formation (Belvitch, Htwe, Brown, & Dudek, 2018). These changes can result in  
62 edematous buildup of fluid, ions and other solutes, as well as enhanced immune cell infiltration  
63 across multiple tissue types and disease processes (Aghajanian et al., 2008; Escibano et al.,  
64 2019).

65 Cellular structures involved in regulating barrier function include: 1) The Tight junction (TJ), which  
66 provides a gating mechanism that directly controls the exchange of substances across the  
67 paracellular space; 2) The Adherens junction (AJ), which is critical for the establishment and  
68 maintenance of cell-cell adhesion; 3) The Actin cytoskeleton, which controls the overall integrity  
69 of cell-cell contacts via mechanical push/pull forces; and (4) The Gap junction (GJ), which allows  
70 for exchange of signaling molecules and ions between cells through connexin-based transcellular  
71 channels, in addition to providing close points of intercellular adhesion (Derangeon, Spray,  
72 Bourmeyster, Sarrouilhe, & Hervé, 2009; B. N. Giepmans, 2004; Radeva & Waschke, 2018). While  
73 initially conceived of as independent, these transcellular complexes were subsequently identified  
74 as sharing direct interactions with the tight junction scaffolding molecule, Zonula Occludens 1  
75 (ZO1), which is thought to contribute to biochemical and biophysical crosstalk between their  
76 protein components (Derangeon et al., 2009; Garcia, 2009; B. N. Giepmans, 2004; Hervé,  
77 Bourmeyster, Sarrouilhe, & Duffy, 2007).

78 Findings have emerged over the last 20 years or more that gap junctional connexins, especially  
79 the most studied isoform, Connexin 43 (Cx43), influences barrier function and permeability  
80 (Strauss & Gourdie, 2020). There is also growing appreciation that this may involve both channel-  
81 dependent and independent functions of Cx43, including via effects on intercellular  
82 communication, membrane permeability, cell-cell contact arrangements and cytoskeletal  
83 dynamics, junction assembly, cell polarity, and transcriptional regulation (Francis et al., 2011;  
84 Kameritsch, Pogoda, & Pohl, 2012; Leithe, Mesnil, & Aasen, 2018; Matsuuchi & Naus, 2013; Olk,  
85 Zoidl, & Dermietzel, 2009). While mounting evidence suggests that Cx43-based channel activity  
86 can modulate barrier function changes under pathological stress conditions, the channel-

87 independent role of Cx43 in barrier modulation is less understood. The Cx43 carboxyl-terminus  
88 (CT), exhibits a well-characterized interaction with ZO1, specifically at its PDZ2 domain (B. N. G.  
89 Giepmans & Moolenaar, 1998; Sorgen et al., 2004; Sorgen, Trease, Spagnol, Delmar, & Nielsen,  
90 2018). While the details of this structural interaction are well-established, the functional  
91 consequences remain to be characterized. In this study, we examine the effects of short mimetic  
92 peptides based on the Cx43 CT sequence, with and without the capacity to interact with ZO1. Our  
93 results indicate that  $\alpha$ CT1, which incorporates the CT-most 9 amino acids of Cx43, protects  
94 endothelial cell barrier function in a ZO1 interaction-associated manner.  $\alpha$ CT1 is presently in  
95 clinical testing in humans for healing of normal and chronic skin wounds (Lampe and Laird, 2018;  
96 Strauss and Gourdie, 2020). The barrier protective effect of  $\alpha$ CT1 is accompanied by marked  
97 changes in patterns of ZO1, VE-Cadherin, Cx43, and actin cytoskeleton remodeling in peptide-  
98 treated cells. Taken together, our data suggests that modulation of actin-based inter- and intra-  
99 cellular push/pull forces may be a key aspect of the molecular mechanism of  $\alpha$ CT1 on barrier  
100 function, contributing to the mode-of-action of this therapeutic peptide in regulating tissue  
101 edema.

102

## 103 **Results**

104

### 105 **$\alpha$ CT1 requires a CT isoleucine to associate with ZO1 at borders between MDCK cells**

106

107 The  $\alpha$ CT1 peptide consists of the CT-most 9 amino acids of Cx43: Arg-Pro-Arg-Pro-Asp-Asp-Leu-  
108 Glu-Iso or RPRPDDLEI, includes a 16–amino acid N-terminal antennapedia sequence (ANT) and  
109 typically has an N-terminal biotin tag (Hunter, Barker, Zhu, & Gourdie, 2005). The last four amino  
110 acids of  $\alpha$ CT1 (DLEI) mimic the class II PDZ-binding motif of Cx43, which has been shown to  
111 mediate interactions with the second of the three PDZ (PDZ2) domains of the tight junction  
112 protein, ZO1 (Jiang et al., 2019). Deletion of the CT isoleucine of this motif abrogates interaction  
113 of  $\alpha$ CT1 with ZO1 PDZ2, as is the case with the ZO1 binding-incompetent  $\alpha$ CT1-I variant used in  
114 this, as well as our previous work on the molecular mechanism Cx43 CT peptides in mitigating  
115 cardiac ischemia reperfusion injury (Jiang et al., 2019). In these studies, we demonstrated that in  
116 addition to interacting with ZO1,  $\alpha$ CT1 has the capacity to interact with Cx43 CT itself.

117 Using Electric Cell-Substrate Impedance Sensing (ECIS) we previously reported that  $\alpha$ CT1  
118 abrogates EGTA-induced loss of barrier function in retinal pigment epithelial monolayers (Obert  
119 et al., 2017). Follow-up ECIS experiments in the present study indicated that Cx43-deficient  
120 Madin-Darby Canine Kidney (MDCK) cell cultures were similarly protected by  $\alpha$ CT1, but not  $\alpha$ CT1-  
121 I, from a  $\text{Ca}^{2+}$  chelating, EGTA-treatment. The addition of 100 $\mu$ M  $\alpha$ CT1, 5 min after  $\text{Ca}^{2+}$  chelation  
122 with 2mM EGTA, produced barrier function recovery beyond that observed with the control  
123 peptides,  $\alpha$ CT1-I, and the cell penetration sequence alone, antennapedia (ANT) (Supplementary  
124 Figure 1).

125 These initial barrier function findings in MDCK cells demonstrated the barrier function-  
126 modulating potential of the 9 amino acid (aa) CT-most sequence of Cx43. These observations  
127 further indicated that  $\alpha$ CT1's mechanism of action likely involved ZO1 binding-competency. To  
128 confirm that  $\alpha$ CT1 interacts with ZO1 inside the cell,  $\alpha$ CT1's association with the tight junction  
129 protein, ZO1, was investigated. We first examined  $\alpha$ CT1 uptake and distribution in MDCK cells  
130 using confocal microscopy. Cx43-negative MDCK cells (Figure 1A) were used in this analysis to  
131 reduce confounding binding of the  $\alpha$ CT1 and  $\alpha$ CT1-I to Cx43 itself, a characteristic of both  
132 peptides that we have demonstrated previously (Jiang et al., 2019). Consistent with results from  
133 HeLa cells (Hunter et al., 2005), we observed robust antennapedia peptide-mediated uptake into  
134 MDCK cells. However, unlike HeLa cells, MDCK cells incubated with  $\alpha$ CT1 showed dense  
135 concentrations of peptide co-localized with ZO1 at cell-cell borders (Figure 1C). This pattern  
136 appeared to occur in a dose-responsive manner (Figure 1B), with signal intensity increasing with  
137 increasing concentrations of applied  $\alpha$ CT1 - from 5 $\mu$ M, 100 $\mu$ M to 150 $\mu$ M. This distinctive co-  
138 localization is illustrated further in a 3D-volumetric rendering in Figure 2B, where  $\alpha$ CT1, but not  
139  $\alpha$ CT1-I, can be seen to uniformly and intensely co-localize with ZO1 at an interface containing the  
140 tight junction belt between apposed cells. Quantitative analyses confirmed that  $\alpha$ CT1 colocalized  
141 with ZO1 at cell borders at significantly higher levels than the ZO1 binding-incompetent peptide  
142  $\alpha$ CT1-I, antennapedia (ANT) peptide alone (i.e., with no additional Cx43-related sequence), and  
143 vehicle controls, with no added peptide (Fig 2A, C). To further substantiate  $\alpha$ CT1-ZO1 association,  
144 we performed proximity ligation assays (Duolink) using antibodies against ZO1 and the biotin tags  
145 present on  $\alpha$ CT1 and  $\alpha$ CT1-I peptides. Punctate ZO1-biotin Duolink signals were significantly  
146 increased following incubation of cells with  $\alpha$ CT1, but largely attenuated following incubation

147 with  $\alpha$ CT1-I (Figure 2D, E). Taken together, these data suggested that  $\alpha$ CT1 associates in close  
148 proximity with ZO1 at Cx43-negative MDCK cell-cell borders, requiring a functional ZO1 PDZZ  
149 domain-binding motif to maintain this pattern. These results were consistent  $\alpha$ CT1 directly  
150 targeting and binding to ZO1 located at cell-to-cell junctions.

151 **Figure 1**

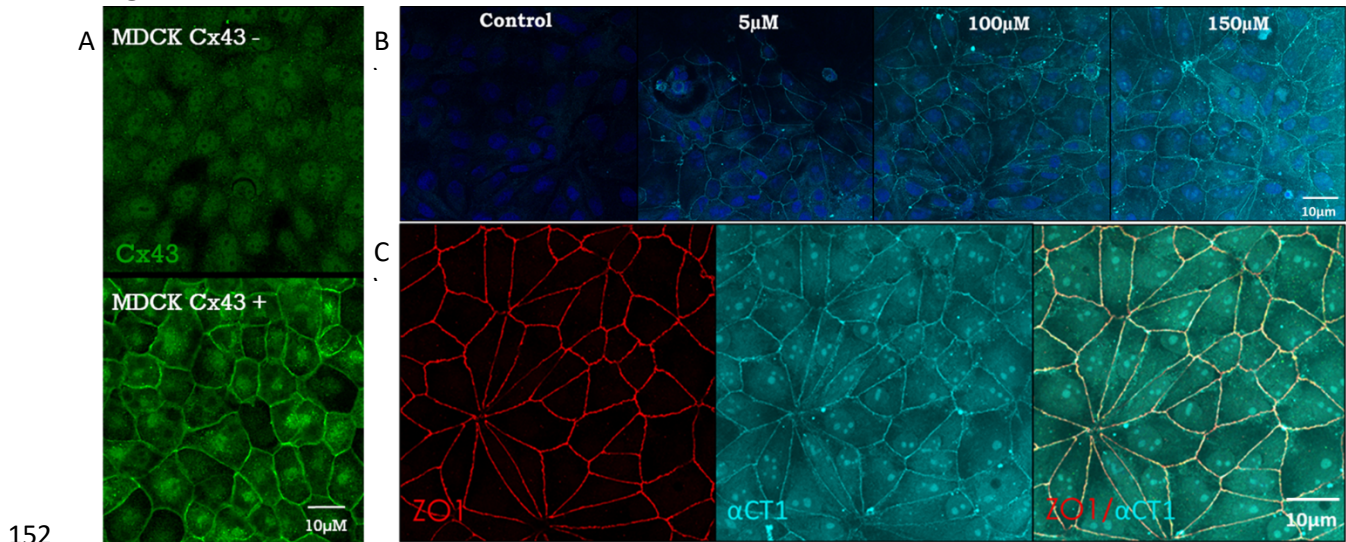

153 **Figure 1: Cx43 CT mimetic peptide,  $\alpha$ CT1, colocalizes with ZO1 inside Cx43-deficient MDCK cells. A)**  
154 **Representative confocal images of Cx43-deficient and Cx43-expressing MDCK cells. B)** Representative  
155 **confocal images of the dose-dependent uptake of fluorescent streptavidin-labeled, biotinylated  $\alpha$ CT1 (0,**  
156 **5, 100,150  $\mu$ M) inside Cx43-deficient MDCK cells, fixed at 1 h post-incubation of peptide. C)**  
157 **Representative confocal images of ZO1 +  $\alpha$ CT1, combined into a merged image to highlight colocalization**  
158 **(yellow).**

159

160

161

162

163



164  
165  
166

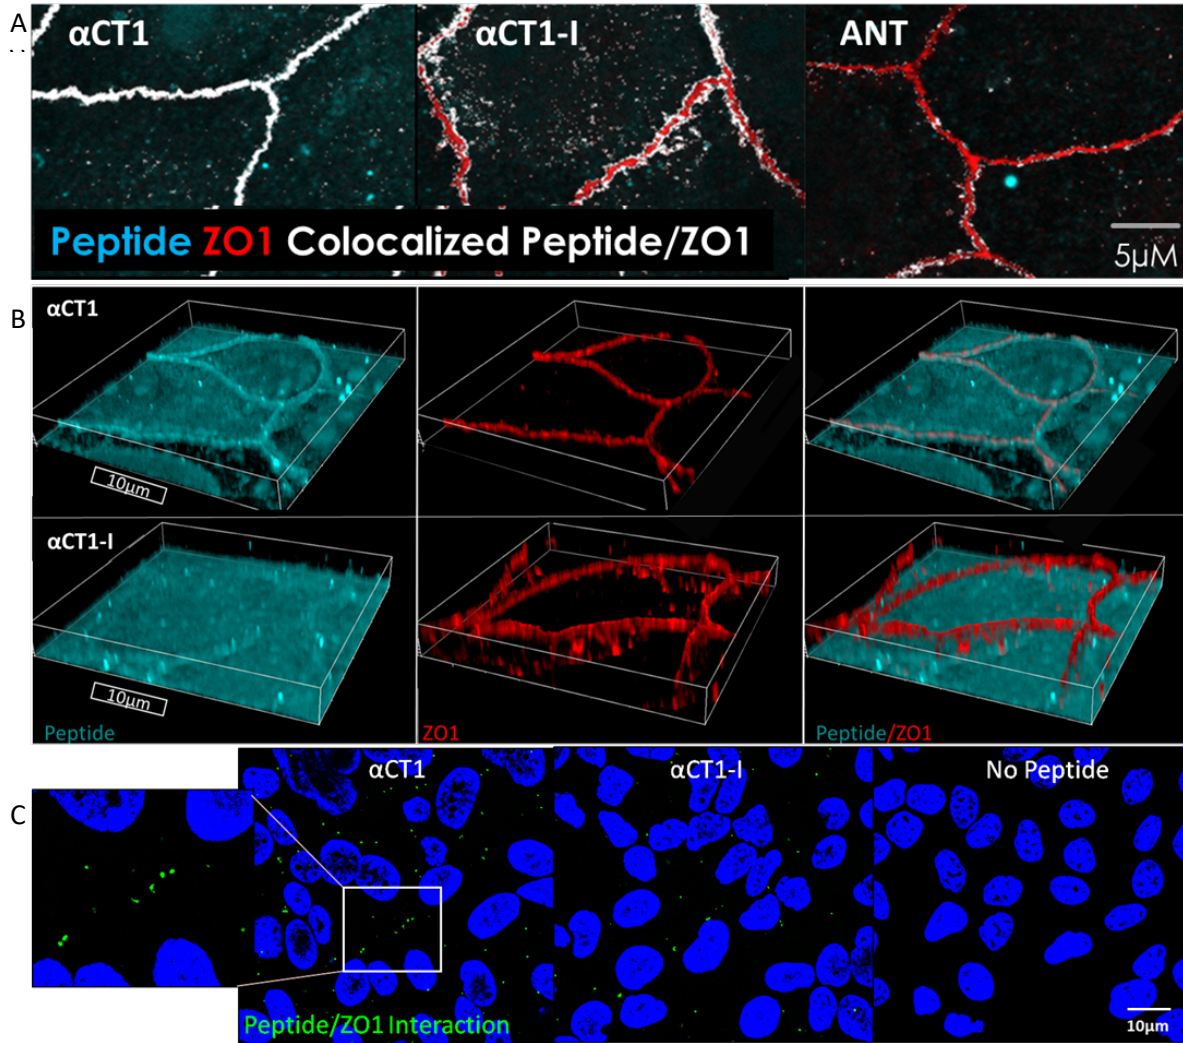

167

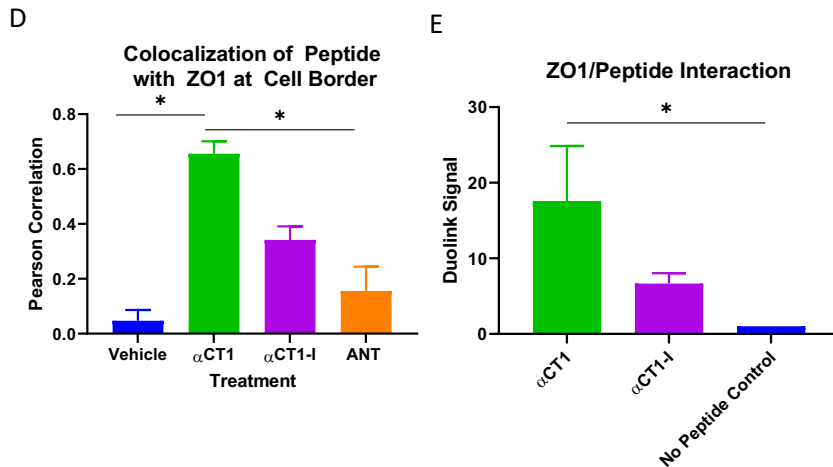

**Figure 2:  $\alpha$ CT1 requires its terminal isoleucine to associate with ZO1 inside Cx43-deficient MDCK cells. A)** Representative confocal images of colocalization

174 (white) between  $\alpha$ CT1 and ZO1 binding-deficient control,  $\alpha$ CT1-I, and cell penetration sequence control,  
175 antennapedia (ANT). **B)** Representative volumetric 3D confocal image renderings of border localization of  
176  $\alpha$ CT1 vs  $\alpha$ CT1-I. **C)** Representative confocal images of the Duolink interaction between peptides and ZO1.  
177 Green spots represent points of interaction. **D)** Quantification of colocalization between the peptides and  
178 ZO1, as determined by Pearson Correlation analysis. **E)** Quantification of the Duolink interaction between  
179 the peptides and ZO1. \*P < 0.05 vs. controls; N = 3.

## 180 **$\alpha$ CT1 inhibits thrombin-induced disruption of endothelial barrier function in a ZO1** 181 **binding-competent manner**

182

183 Previous reports have demonstrated that the Cx43 mimetic,  $\alpha$ CT1, has cardioprotective  
184 properties in an *ex-vivo* mouse model of global ischemia reperfusion injury (Jiang et al., 2019).  
185 We considered that targeting of the coronary vasculature and effects on edema were an  
186 unexplored aspect of the mode-of-action  $\alpha$ CT1 in cardioprotection. Breakdown in endothelial  
187 barrier function is a hallmark of several cardiac pathologies, including ischemia-reperfusion injury  
188 (Heusch, 2018; Mezache et al., 2020) . The barrier protective effects observed in the MDCK cells  
189 (Supplementary Figure 1) raised the possibility that  $\alpha$ CT1 might similarly protect barrier function  
190 within endothelial cells. To investigate the potential for  $\alpha$ CT1 to protect endothelial barrier  
191 function, we used ECIS to assess the barrier-modulating effect of  $\alpha$ CT1 and the ZO1-binding  
192 incompetent control  $\alpha$ CT1-I in microvascular endothelial cell monolayers. To this end, confluent  
193 HMEC-1 monolayers were grown on ECIS electrode arrays, treated with peptide (100 $\mu$ M) for 1h,  
194 then stimulated with thrombin (1U/mL). Thrombin is a well-known barrier function disruptor and  
195 bona fide inflammatory mediator of ischemia reperfusion injury and other cardiac diseases  
196 (Jackson, Darbousset, & Schoenwaelder, 2019). ECIS indicated that pretreatment with  $\alpha$ CT1, but

197 not  $\alpha$ CT1-I, significantly attenuated barrier function disruption induced by thrombin in HMEC-1  
198 monolayers (Figure 3A, B). Interestingly, we noted from ECIS records that a significant level of  
199 stabilization occurred prior to treatment with thrombin, during the one hour period in which cells  
200 were incubated with  $\alpha$ CT1 (Figure 3C). Again, a similar pre-treatment effect was not observed for  
201  $\alpha$ CT1-I (Figure 3C). To further validate our results, we repeated the experiment using a second  
202 well-characterized assay of barrier integrity, a transwell permeability assay based on the flux of  
203 a 4.5 kDa TRITC dextran permeability tracer across the monolayer (Figure 4). In line with the ECIS  
204 data,  $\alpha$ CT1 pretreatment significantly blocked hyperpermeability to the tracer following  
205 exposure to thrombin – at the 10 minute time point of maximum disruption (Figure 4B), as  
206 indicated from initial time course experiments (Figure 4A). By contrast,  $\alpha$ CT1-I demonstrated no  
207 barrier protecting effect. Based on these data we concluded that pretreatment with  $\alpha$ CT1 was  
208 sufficient to maintain endothelial barrier in the context of thrombin-induced disruption, whereas  
209 the ZO1-binding incompetent variant peptide  $\alpha$ CT1-I was unable to mediate a similar protective  
210 effect.

211 **Figure 3**

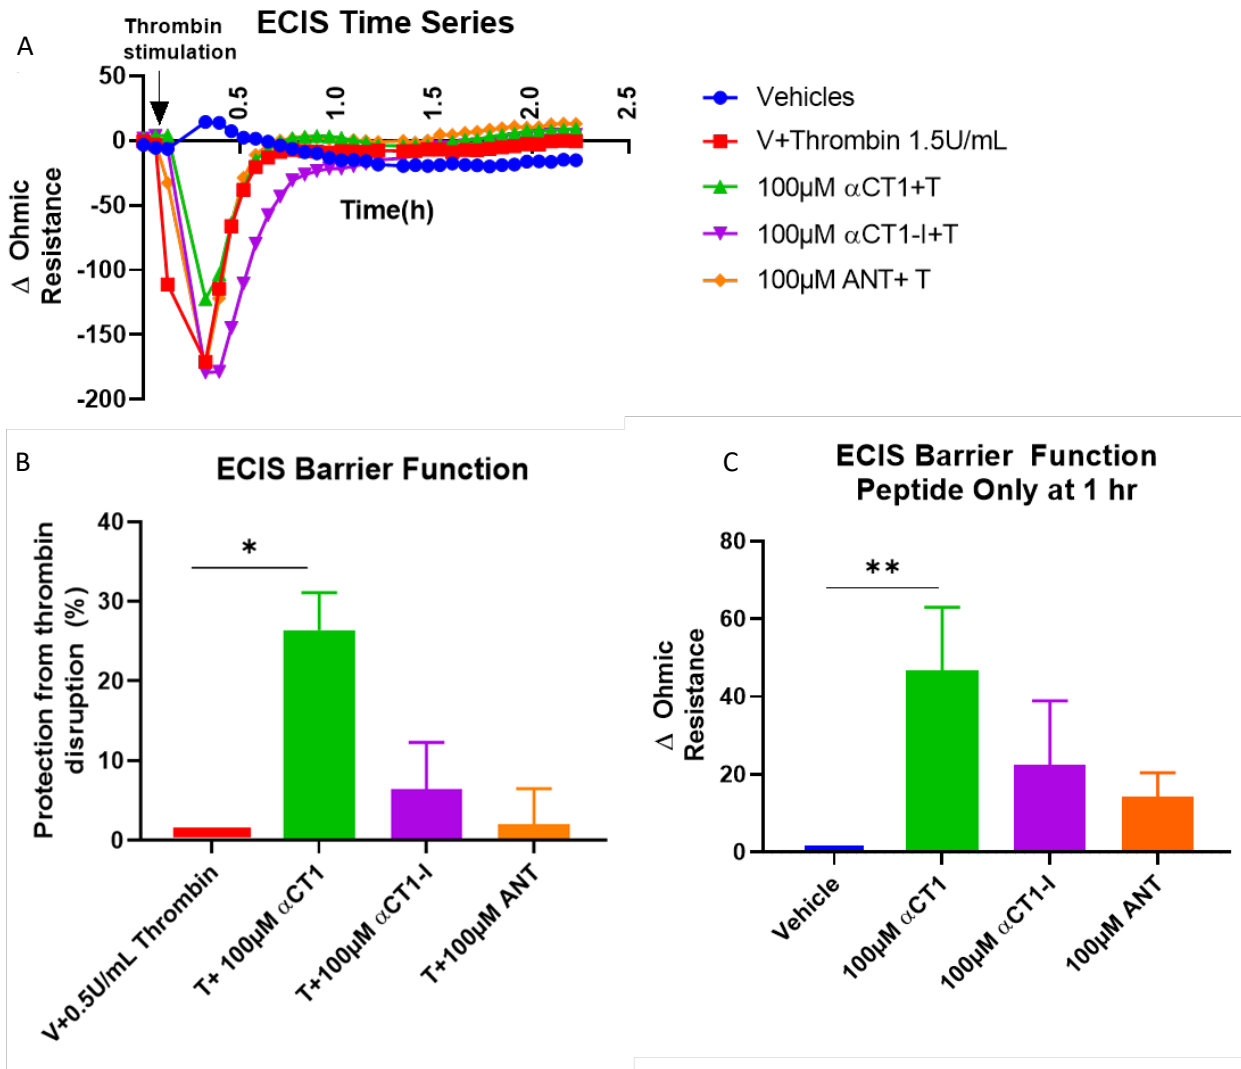

212

213 **Figure 3: αCT1 requires ZO1 binding-competency to protect the endothelial barrier from thrombin-**

214 **induced disruption measured by Electric Cell-substrate Impedance Sensing (ECIS) in HMEC-1 cell**

215 **monolayers. A)** Representative ECIS time series showing peptide-induced barrier function changes

216 following thrombin treatment. Each data point represents the change in ohmic resistance from individual

217 treatment baselines, collected at approx. 4 min intervals. **B)** Approximately 5 min following thrombin

218 addition, peptide-induced barrier function protection was calculated as the percentage of barrier

219 protection from thrombin disruption **C)** At 1 h peptide incubation, prior to thrombin treatment, the effects

220 of peptides on barrier function were calculated as the change in ohmic resistance compared to vehicle  
221 control. \*  $P < 0.05$  vs. controls;  $N = 3-5$ .

222

223 **Figure 4**

224

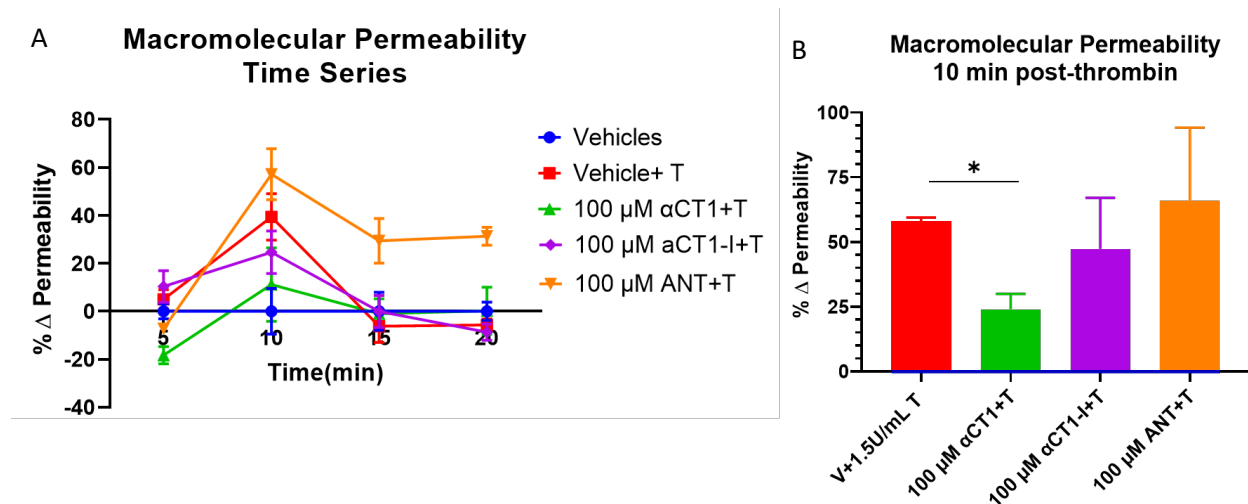

225

226 **Figure 4:  $\alpha$ CT1 requires ZO1 binding-competency to prevent thrombin-induced hyperpermeability in**

227 **HMEC-1 cell monolayers. A)** Representative time course of macromolecular flux to 4.5kDa FITC-dextran

228 across the endothelial monolayer, from the top (apical) to the bottom (basolateral) compartment of

229 transwell chambers. The percentage change in absolute permeability was calculated from fluorescent

230 readings of samples taken from the bottom compartment at 5, 10, 15, and 20 min post-thrombin

231 stimulation. Measurements at each time point were normalized to vehicle control. **B)** The change in

232 permeability at the time point of maximum thrombin disruption (10min), normalized to vehicle control,

233 were averaged across experiments.  $P < 0.05$  vs. Vehicle control;  $N = 4$ .

234

235  **$\alpha$ CT1 prevents thrombin-induced changes in endothelial F-actin and VE-cadherin**  
236 **distribution in a ZO1 binding-competent manner**

237

238 The mode-of-action of thrombin in disrupting barrier function is thought, in large part, to occur  
239 via its effects on the actin cytoskeleton and VE-cadherin (Aslam et al., 2014; Breslin, Zhang,  
240 Worthylake, & Souza-Smith, 2015). Furthermore, a previous collaborative report demonstrated  
241 that  $\alpha$ CT1 produces significant changes to the actin cytoskeleton in brain endothelial cells, via a  
242 ZO1 PDZ2 interaction (Chen et al., 2015). Therefore, HMEC-1 cells grown on solid substrates were  
243 immunolabeled for F-actin and VE-Cadherin following a similar treatment protocol described for  
244 ECIS barrier function experiments, then fluorescent signals imaged using confocal microscopy.

245 We used this approach, together with a high-throughput quantitative image analysis software,  
246 Cell Profiler (McQuin et al., 2018), to quantify changes in the cellular distribution of F-actin and  
247 VE-Cadherin in our thrombin/peptide treatment model. Initial observations showed that  
248 untreated control HMEC-1 cells grown in monolayers exhibited thin, well-delineated bands of  
249 cortical actin marking the boundaries of cells, consistent with intact barrier function, as well as  
250 isolated fibers stretching across the cytoplasm of the cell (Figure 5). Thrombin treatment  
251 attenuated this sharp F-actin border, causing cells to form densely packed fibrous sheets of stress  
252 fibers that stretched across the cell, either through the center of the cell or just outside the cell-  
253 center, in a manner consistent with cytoskeletal structures commonly linked to endothelial  
254 barrier function disruption in the literature (e.g., Figure 5). Thrombin also increased the  
255 formation of intercellular gaps. The thrombin-induced effects on F-actin at 5 min post-thrombin  
256 stimulation observed here are consistent with previous reports (Doggett & Breslin, 2011; Rabiet  
257 et al., 1996). As for VE-Cadherin, thrombin attenuated the sharp, linear VE-Cadherin signal at the  
258 cell border, while simultaneously reducing concentrations of signal towards the center of the cell  
259 (Figure 5).

260 To quantify these changes, normalized intensities of F-actin and VE-Cadherin immunolabeling  
261 were measured at 20 successive equivalently spaced intervals from the nucleus to the peripheral  
262 border of cells in the different treatment groups, as detailed in methods (see diagram in Figure  
263 6A). Statistically significant differences in the cellular distribution of F-actin and VE-Cadherin  
264 between the treatment conditions compared to thrombin alone are displayed in Figure 6 and in  
265 Supplemental Table 1. Overall, F-actin distribution increased more or less linearly from the cell  
266 nucleus outward to the cell periphery, peaking in mean fractional intensity near the cell periphery  
267 (Figure 6A). VE-Cadherin distribution showed an opposite trend, though with an upward  
268 inflection in fractional intensity in region 17, located just a few radii inward from cell borders.  
269 Importantly,  $\alpha$ CT1, but not  $\alpha$ CT1-I pretreatment inhibited the thrombin-induced changes in F-  
270 actin morphology, consistent with barrier function effects described previously (Figure 6B). This  
271  $\alpha$ CT1-associated effect, compared to  $\alpha$ CT1-I, was marked by a significant increase in the  
272 proportion of peripherally located cortical actin, simultaneous with increase in VE-Cadherin at  
273 cell-cell borders. See Figures 6A and 6B for mean fractional intensity values, and Figures 6C and  
274 6D for vehicle baseline-subtracted values for F-actin and VE-cadherin respectively.  $\alpha$ CT1, but not  
275  $\alpha$ CT1-I, also prevented thrombin-induced reduction in VE-Cadherin cellular distribution in the  
276 four peripheral-most cell compartments, while changes were not significant around the cell  
277 center – as indicated by the yellow-highlighted regions on the graphs shown in Figure 6. These  
278 data indicated that  $\alpha$ CT1 required ZO1-binding competency to protect against thrombin-induced  
279 barrier function-associated changes in F-actin and VE-Cadherin.

280 **Figure 5**

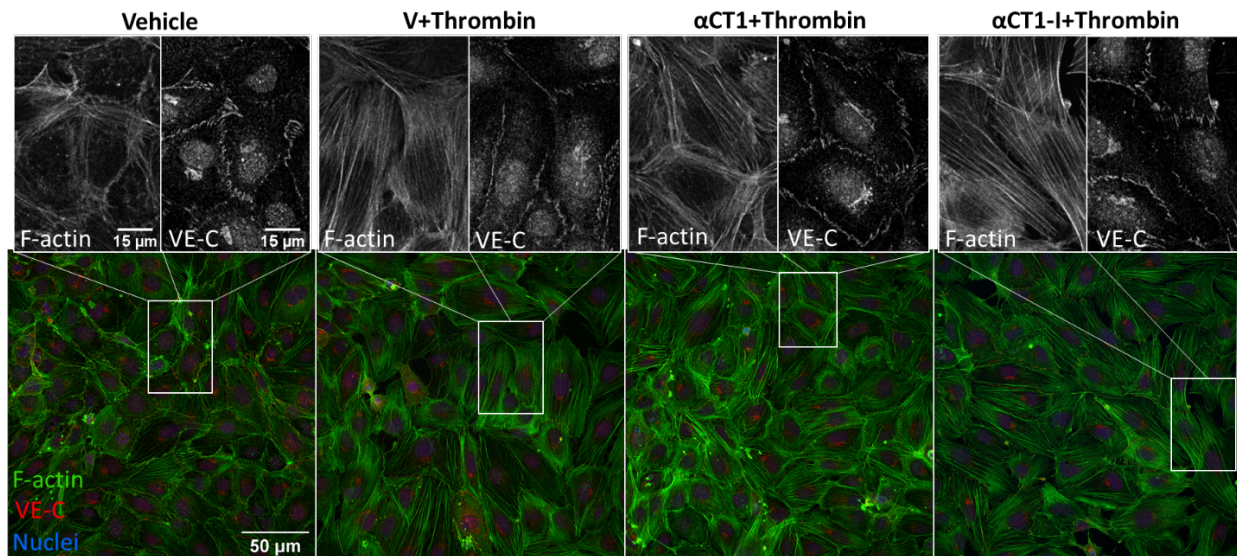

281

282 **Figure 5:  $\alpha$ CT1 inhibits thrombin-induced shift in endothelial F-actin and VE-cadherin distribution in**

283 **HMEC-1 cell monolayers.** Representative confocal images of F-actin and VE-Cadherin in 100 $\mu$ M labeling

284 in peptide-treated, HMEC-1 cells, fixed 5 min after thrombin addition to the media. Zoomed sections show

285 representative treatment-induced F-actin and VE-Cadherin changes.



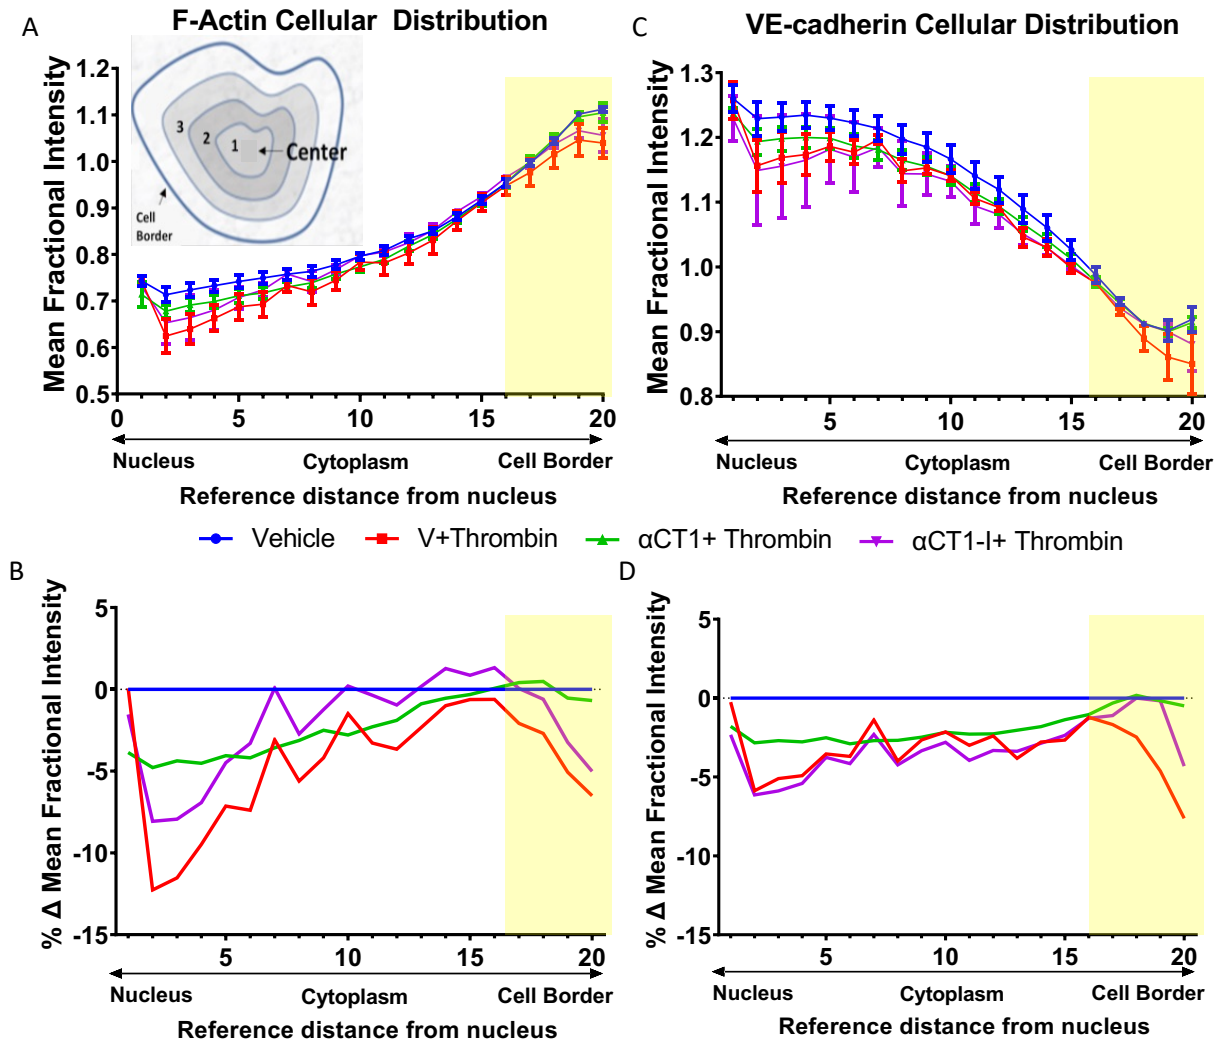

286  
287  
288  
289

## Figure 6

290 **Figure 6: Quantification of  $\alpha$ CT1 inhibition of thrombin-induced shift in endothelial F-actin and VE-**  
291 **cadherin distribution in HMEC-1 cells. A,C) The radial distributions of F-actin (Top left) and VE-cadherin**  
292 **(Top right) were measured as the mean fractional intensity at a given cell radius, calculated as fraction of**  
293 **total intensity normalized by fraction of pixels at a given radius. Cell diagram of regions 1-20 indicated in**  
294 **top left figure. B,D ) F-actin (Bottom left) and VE-cadherin (Bottom right), vehicle-subtracted values**

295 calculated as percentage difference from vehicle 100% (Value-Vehicle)/Vehicle). N = 3 Yellow highlighted  
296 bar indicates where  $\alpha$ CT1+T, but not  $\alpha$ CT1-I+T is significant compared to thrombin alone.

297  **$\alpha$ CT1 requires ZO1 binding-competency to modulate the distribution of F-actin, ZO1 and**  
298 **Cx43 in cultured endothelial cells.**

299

300 To further validate our observations on HMEC-1 cells, another endothelial cell line, Human  
301 Dermal Microvascular Endothelial cells (HDMECs), was grown to confluence on collagen-coated  
302 transwell filters. HDMECs were used for purposes of improved imaging and quantification of  
303 peptide treatment-associated phenomena due to the well-defined cell-cell borders and more  
304 uniformly arrayed junctional structures found in this endothelial cell line. Previous reports have  
305 indicated that  $\alpha$ CT1 targets TJ protein, ZO1, to increase gap junctional Cx43 levels at the cell  
306 border in Hela cells, and that gap junctional Cx43 provides points of close cell-cell contact (Elias,  
307 Wang, & Kriegstein, 2007; Rhett, Jourdan, & Gourdie, 2011). Therefore, in this set of experiments,  
308 cells were stained for F-actin, ZO1, and Cx43 (Figure 6). As in HMEC-1s, untreated vehicle control  
309 HDMECs exhibited thin, clearly delineated bands of cortical F-actin marking the boundaries of  
310 the cell, while thrombin treatment attenuated this sharp F-actin border, inducing the formation  
311 of densely packed stress fibers stretching across the cell, including the cell center. Also similar to  
312 the pattern observed in HMEC-1 cells,  $\alpha$ CT1, but much less so  $\alpha$ CT1-I, blocked this shift in F-actin  
313 distribution in HDMECs (Figures 7, 8A-B Supplemental Table 2), with a marked attenuation and  
314 enhancement of cytosolic and peripheral F-actin distribution, respectively. HDMEC monolayers  
315 pretreated with the cell penetration sequence control, antennapedia (ANT), showed a near  
316 identical F-actin distribution pattern as thrombin treatment alone (Figure 8A-B).

317 Changes in the distribution of Cx43 and ZO1 induced by thrombin alone did not reach statistical  
318 significance at any sub-region within HDMECs (Figures 8C-F, Supplemental Table 2). However,  
319 the effects of  $\alpha$ CT1 on Cx43 and ZO1 in combination with thrombin were significant, with marked  
320 discrimination from the effects of the ZO1 binding-incompetent control,  $\alpha$ CT1-I, and the cell  
321 penetration sequence control, ANT. Consistent with previous reports on peptide-induced  
322 changes in Cx43 distribution at cell-cell contacts (Rhett et al., 2011),  $\alpha$ CT1, but not  $\alpha$ CT1-I,  
323 produced a significant increase in the proportion of Cx43 at cell-cell borders, while both peptides  
324 reduced the proportion of signal located in nuclear and cytoplasmic regions (Figure 8B and 8E,  
325 Supplemental Table 2). Similar changes in ZO1 signal across the different cellular sub-regions  
326 were seen with  $\alpha$ CT1, but not  $\alpha$ CT1-I or ANT (Figure 8C and 8D, Supplemental Table 2). The 95%  
327 confidence intervals for each treatment mean at each sub-region for actin, ZO1, and Cx43 and  
328 details of statistically significant differences for these proteins between the treatment conditions  
329 compared to thrombin alone are summarized in Figure 8 and Supplemental Table 2. The yellow  
330 bars in Figure 8 indicate cell regions in which effects of  $\alpha$ CT1 on the junctional protein  
331 distributions are discriminated from  $\alpha$ CT1-I with respect to thrombin alone ( $p < 0.05$ ). In sum, it  
332 was observed that the ZO1-binding-competent Cx43 CT peptide inhibited induction of stress  
333 fibers and junctional remodeling in response to thrombin, maintaining actin in more  
334 homeostatic-like cortical distributions in the two endothelial cell lines studied.

335 Figure 7

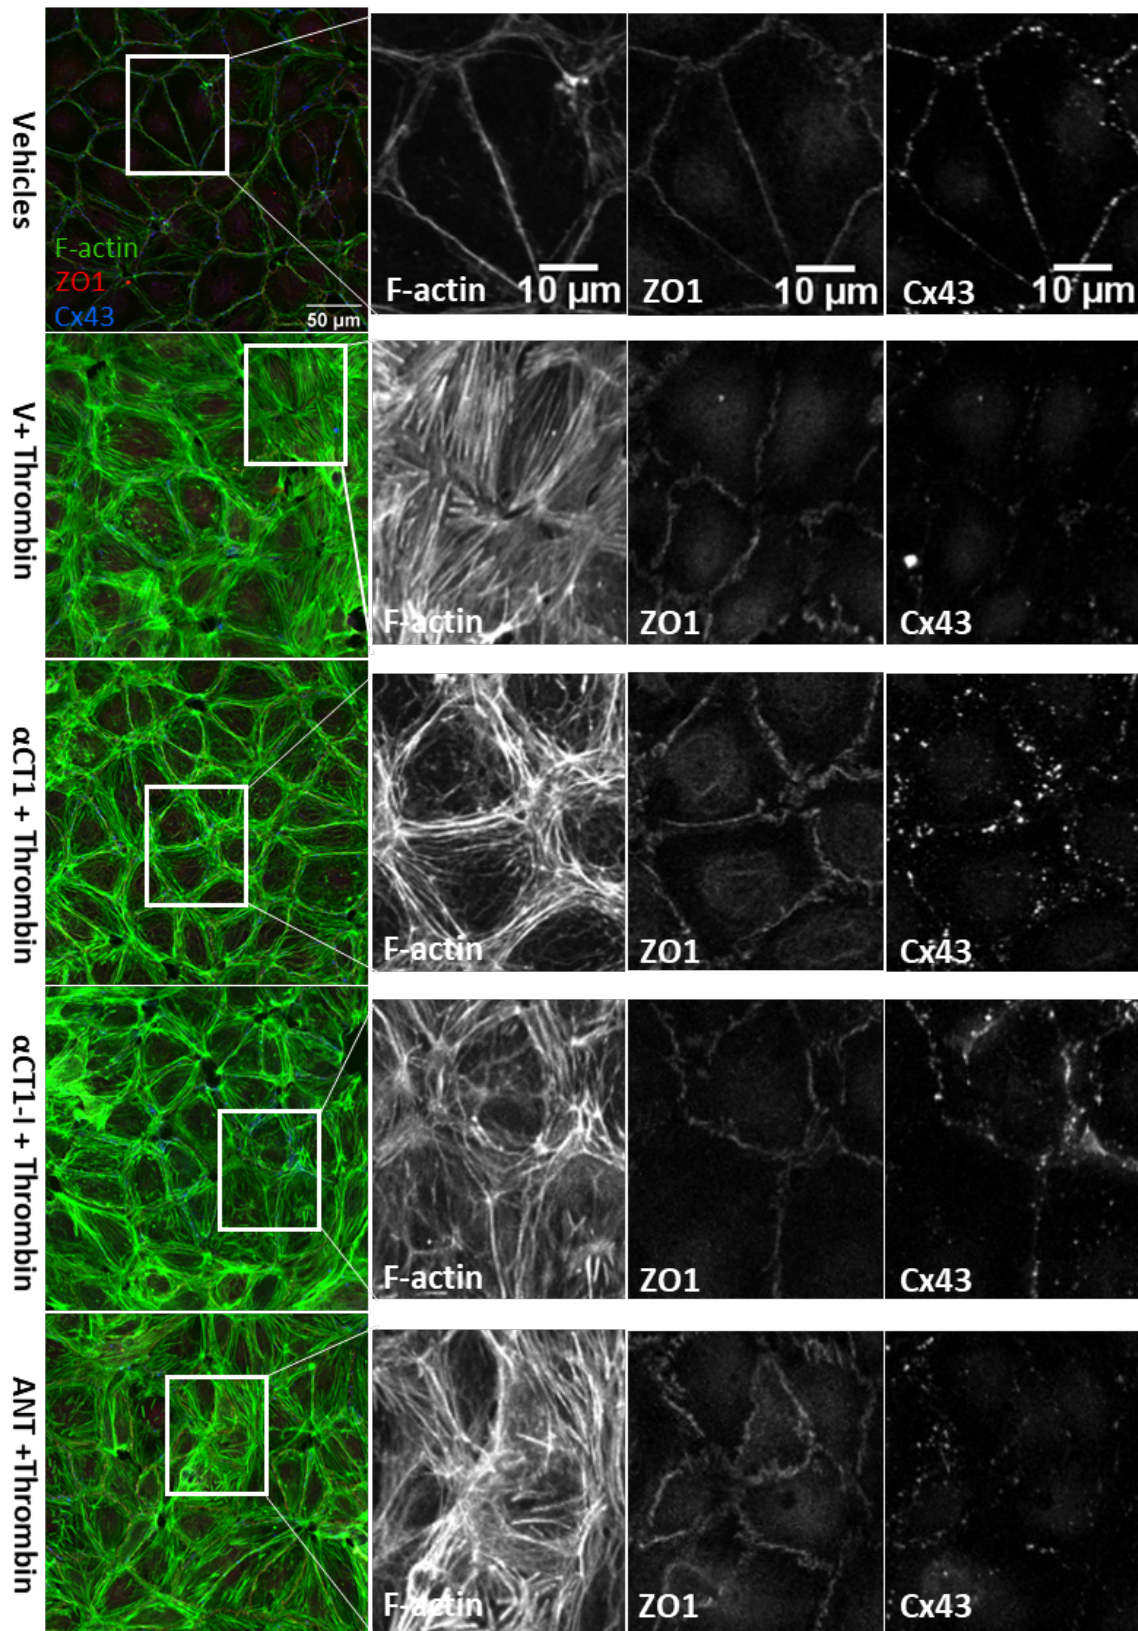

336

337

338 **Figure 7:  $\alpha$ CT1 inhibits thrombin-induced shift in endothelial F-actin distribution in association with ZO1**

339 **and Cx43 remodeling in HDMEC monolayers.** – Representative confocal images of F-actin cytoskeleton,

340 Cx43, and ZO1 distribution in 100  $\mu$ M peptide-treated, transwell filter-grown HDMECs, fixed 10 min after

341 thrombin addition to the media. Black and white zoomed images show treatment-induced changes in

342 more detail at the level of cell-cell contacts.

343

344 **Figure 8**

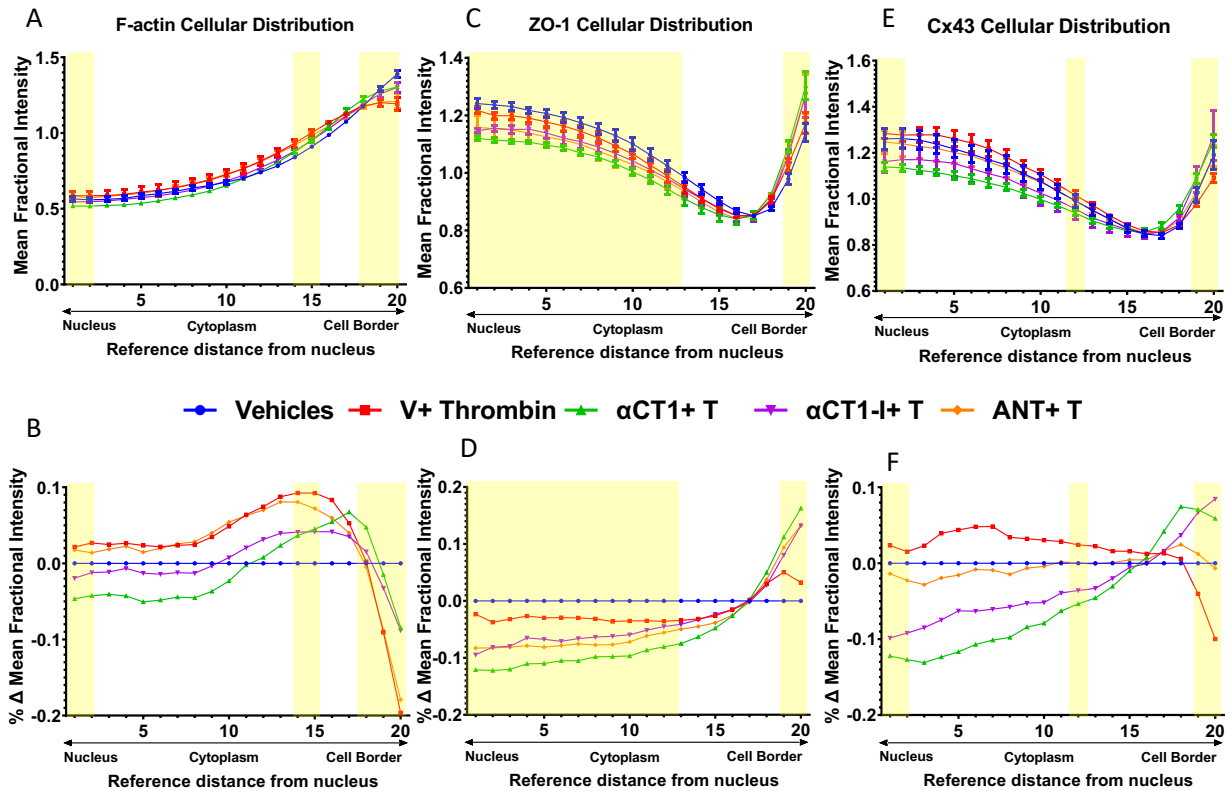

345

346 **Figure 8: Quantification of  $\alpha$ CT1 inhibition of thrombin-induced shift in endothelial F-actin distribution**

347 **in association with ZO1 and Cx43 remodeling in HDMECs.** A, C, F) The radial distributions of F-actin (Top

348 left) and ZO1 (Top middle) and Cx43 (Top right)) were measured as the mean fractional intensity at a given

349 cell radius, calculated as fraction of total intensity normalized by fraction of pixels at a given radius. Cell  
350 diagram of regions 1-20 indicated in top left figure. **B, D, E** F-actin (Bottom left) and ZO1 (Bottom middle)  
351 and Cx43 (Bottom right), vehicle-subtracted values calculated as percentage difference from vehicle 100%  
352 (Value-Vehicle)/Vehicle). N=3. Yellow highlighted bar indicates where  $\alpha$ CT1+T, but not  $\alpha$ CT1-I+T or ANT+T  
353 is significant compared to thrombin alone.

354  **$\alpha$ CT1 requires ZO1 binding-competency to exert changes in distribution of cell**  
355 **orientations**  
356

357 An F-actin cytoskeleton-related phenomenon that has been recently linked to barrier function  
358 regulation is cellular orientation or handedness (Fan et al., 2018). We assessed cellular  
359 orientation on HDMEC monolayers treated with  $\alpha$ CT1, as compared to thrombin and peptide  
360 controls, and noted that distribution of cell orientations showed significant correlation to the  
361 different patterns of actin remodeling seen in our experimental model (Figure 9). Skewness  
362 measurements of cell orientation indicated that thrombin shifts the distribution of cell  
363 orientation from one side of a normal distribution to the other. That is, under vehicle conditions,  
364 the majority of cell orientations took on “negative” angles with respect to an arbitrary  $X=0^\circ$   
365 reference axis, while thrombin stimulation “flipped” the cells to take on positive angles.  $\alpha$ CT1  
366 pronouncedly reduced the skewness measure to near zero, indicating a near complete  
367 attenuation of cell-orientation bias. A Kolmogorov–Smirnov (KS) test on cell orientation data was  
368 performed to further confirm the significance of these findings (data not shown).

369 **Figure 9**

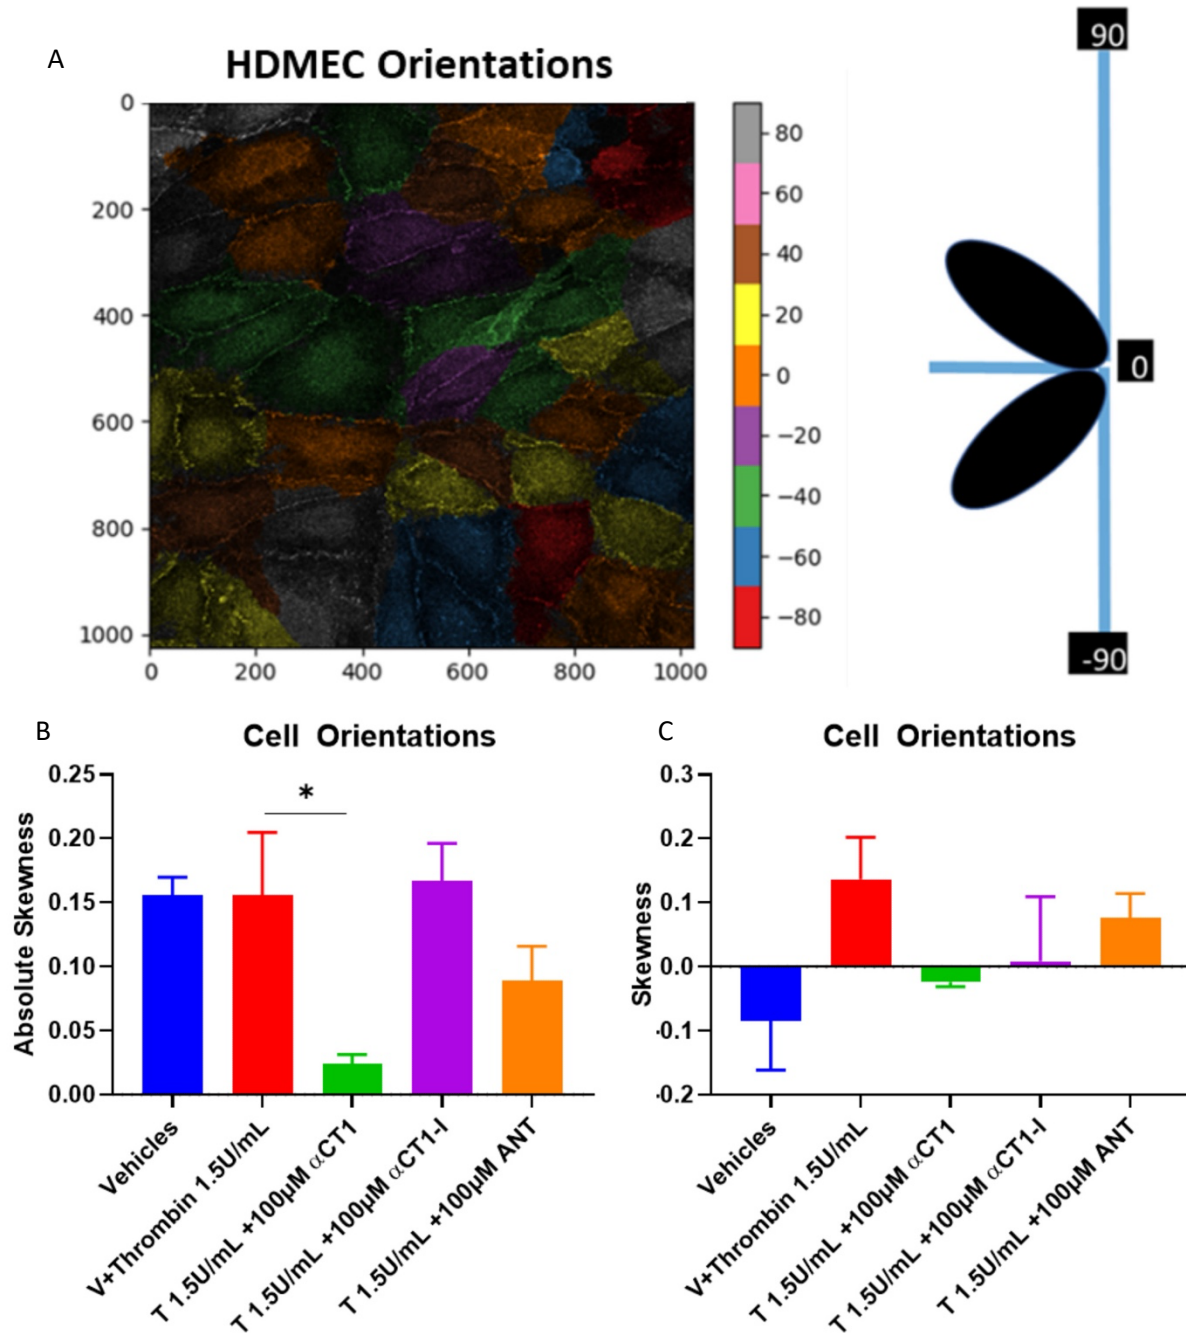

370 **Figure 9: αCT1 alters distribution of cell orientations in HDMEC monolayers.** A) Representative diagram  
371 of cell angle designation across a HDMEC monolayer. B) Absolute Skewness measurements, calculated as  
372 the absolute value of  $g_1$  = the average value of  $z_3$ , where  $z$  is the familiar z-score,  $z = (x - \bar{x}) / \sigma$ , where  $x$  is  
373 the individual cell angle with respect to  $0^\circ$  angle reference axis. C) Raw Skewness values calculated as  $g_1$   
374 above, no absolute value calculated, \*  $P < 0.05$  vs. Thrombin;  $N = 3$ .

375  **$\alpha$ CT1 reduces vascular leak in Langendorff-perfused mouse hearts**

376

377 As mentioned earlier, a cardiovascular protective effect of  $\alpha$ CT1 was hypothesized to in part to  
378 result from the peptide's targeting to the coronary vasculature within the heart (Jiang et al.,  
379 2019). Thus, to determine if the *in vitro* endothelial barrier protection by  $\alpha$ CT1 applied to an *ex-*  
380 *vivo* setting, vascular leakage within peptide-treated mouse hearts was assessed. Langendorff-  
381 perfused mouse hearts were perfused for 20 minutes with Tyrode's solution with or without  
382  $\alpha$ CT1 (100uM), followed by 40 minutes with thrombin (1.5U/ml). The permeability tracer FITC-  
383 dextran (10 mg/ml), the same tracer used previously in the transwell permeability assay (Figure  
384 3), was added to the final 10 ml of perfusate. Overall, as assessed by quantitative confocal  
385 microscopy of cryosections from the hearts, thrombin significantly increased FITC extravasation  
386 relative to control (by ~88%).  $\alpha$ CT1 treatment markedly decreased FITC extravasation compared  
387 to thrombin alone ( $p < 0.05$  vs. thrombin), nearly restoring it to vehicle control levels (Figure 10).



388 **Figure 10**

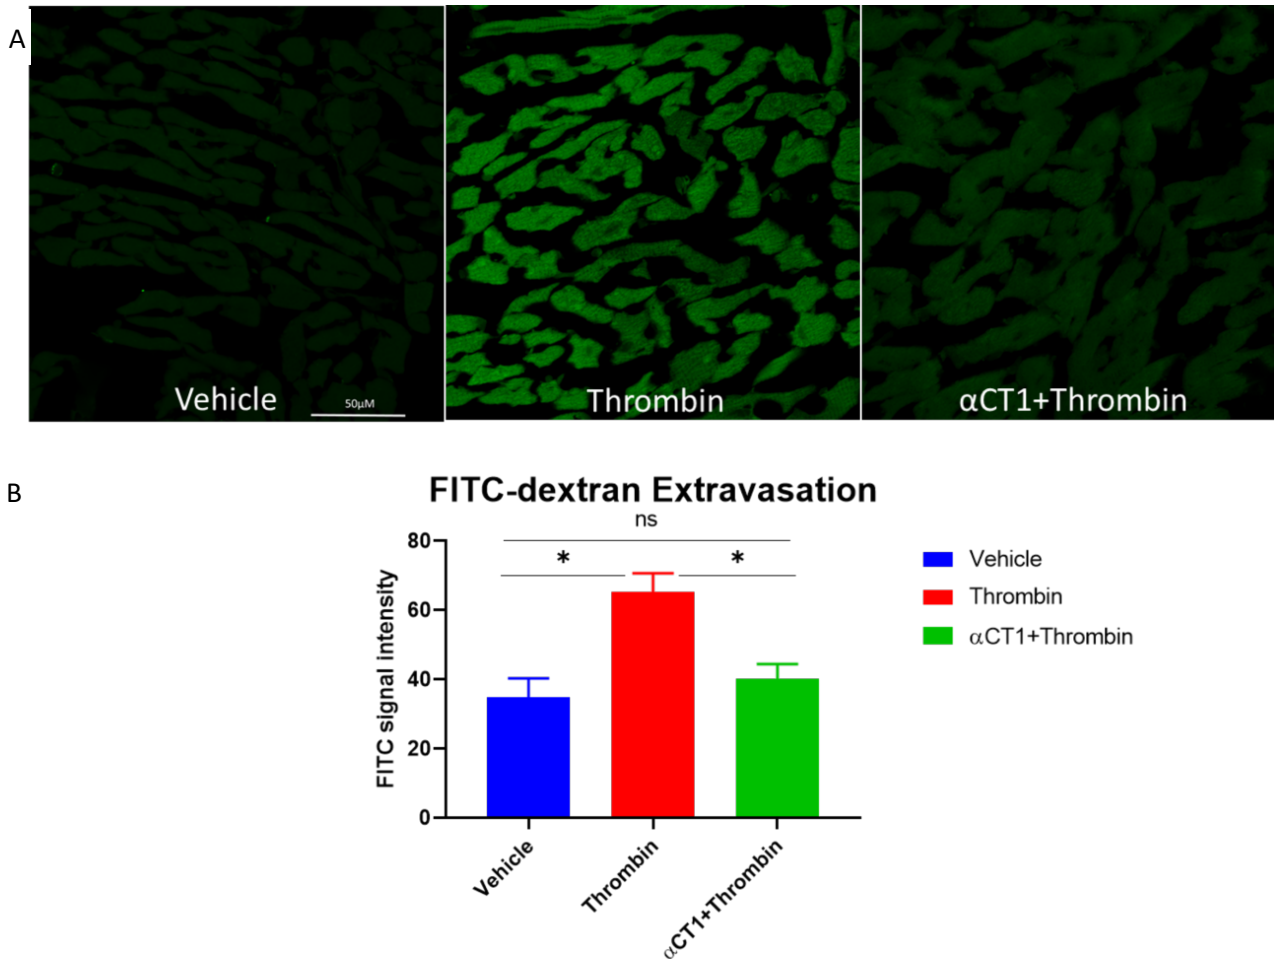

390 **Figure 10: αCT1 inhibits thrombin-intravascular leak in Langendorff-perfused mouse hearts. A)**

391 Representative confocal images of FITC-dextran extravasation within Langendorff-perfused mouse hearts.

392 **B)** Quantification of FITC-dextran signal within mouse hearts perfused 40 minutes with thrombin

393 (1.5U/ml) with or without 20 min αCT1 (100uM) pre-treatment. SE bars, \* P < 0.05

394

395 **Figure 11**

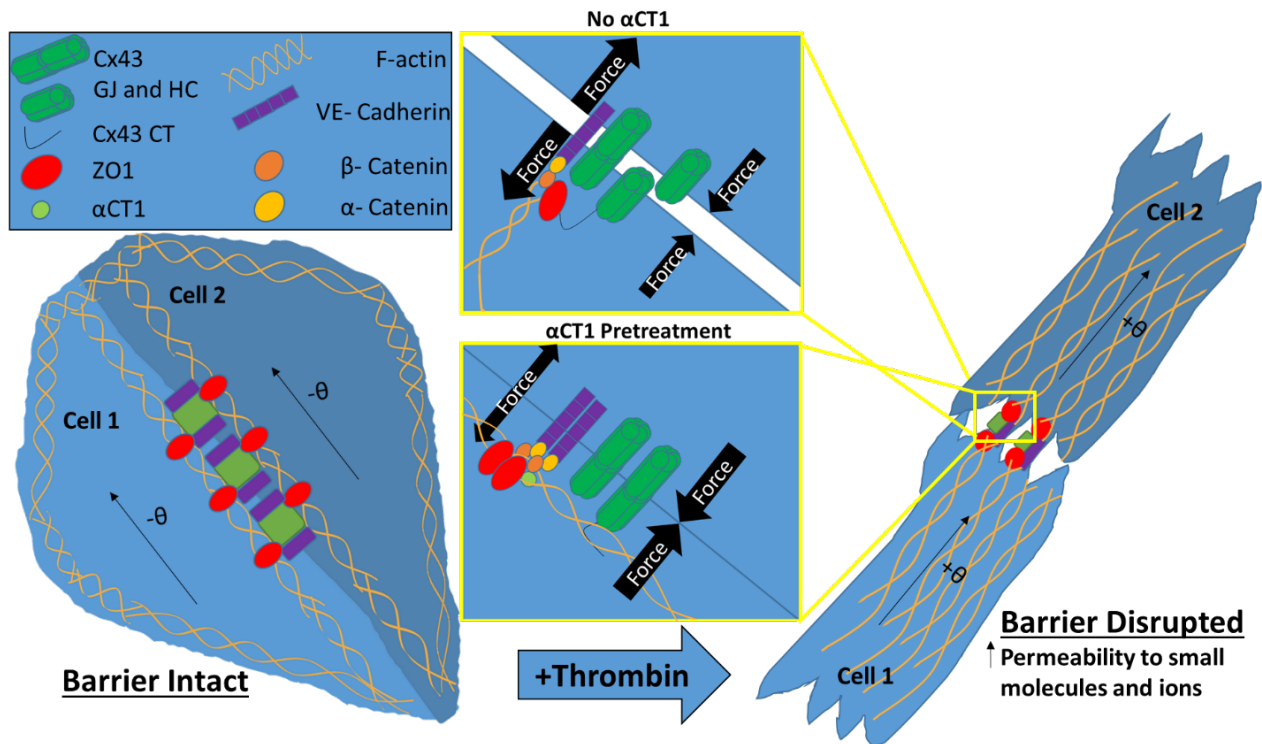

396

397 **Figure 11: Simplified model of  $\alpha$ CT1 effects on endothelial cells in monolayers under thrombin**

398 **stimulation.** Thrombin stimulation of endothelial cells produces a redistribution of F-actin from

399 peripherally located cortical actin to stress fibers that cut across the cytoplasm. These stress fibers

400 terminate onto VE-cadherin containing adherens junctions at the cytoplasmic plaque of the membrane,

401 and in their contractile state, and are thought to exert barrier-destabilizing pulling forces at the cell

402 membranes of opposing cells (Burrige & Wittchen, 2013). This accompanies a reduction and remodeling

403 of adherens junctions, intercellular gap formation and increased permeability to small molecules and ions.

404 In correlation with these changes, thrombin flips the F-actin controlled orientation of cells in the

405 monolayer to take on angles opposite to those observed in homeostatic conditions in which the barrier is

406 intact (Fan et al., 2018).  $\alpha$ CT1 pretreatment of endothelial monolayers appears to inhibit these

407 thrombin-induced changes in a ZO1-interaction-dependent manner, reducing stress fiber formation and

408 maintaining actin in more cortical distributions.  $\alpha$ CT1 treatment is also associated with increased Cx43

409 gap junctional contacts, maintenance of VE-cadherin-containing adherens junctions and ZO1-containing

410 tight junctions at cell borders. We hypothesize that uncoupling of ZO1 from anchorage at key membrane-  
411 associated partner proteins (e.g., Cx43,  $\alpha$ -catenin) via ligand binding to its PDZ2 domain (e.g., by  $\alpha$ CT1),  
412 may offset the perpendicular alignment of F-actin fibers. This in turn may reduce the ability of stress fibers  
413 aligned in this manner to exert centripetal force onto the cytoplasmic face of adherens junctions, reducing  
414 extracellular gap formation, stabilizing the endothelial barrier and maintaining heterogeneous patterns of  
415 cell orientation in response to stressors such as thrombin.

416

417

418

## 419 **Discussion**

420

421 In this study, we investigated the effects of Cx43 CT mimetic peptide  $\alpha$ CT1 on trans-endothelial  
422 permeability and junctional and cytoskeletal proteins that determine this function. We found  
423 that pre-treatment with  $\alpha$ CT1 protects vascular barrier function from thrombin-induced  
424 disruption in *ex vivo* (Langendorff-perfused mouse heart) and *in vitro* (ECIS and Transwell  
425 permeability) models. Barrier protection *in vitro* by  $\alpha$ CT1 occurred in association with localization  
426 of the peptide with ZO1 at cell-to-cell borders, specific effects on cell orientation and changes in  
427 patterns of F-actin, VE-Cadherin, Cx43, and ZO1 remodeling, particularly at the periphery of cells.  
428 Importantly, a ZO1 binding-incompetent variant of  $\alpha$ CT1,  $\alpha$ CT1-I, showed no propensity to  
429 associate with ZO1 at the cell periphery and also demonstrated no facility for protecting barrier  
430 function, suggesting that ZO1 binding-competency is required for Cx43 CT mimetic peptides to  
431 affect the vascular permeability parameters assessed.

432 The findings we present herein are consistent with previous studies indicating a protective role  
433 of Cx43 CT in channel-independent modulation of barrier function. Mice deficient in the Cx43 CT  
434 die as a result of epithelial barrier dysfunction, despite maintaining normal GJIC (Maass et al.,  
435 2004). Obert and colleagues (2017) showed that the Cx43 CT mimetic,  $\alpha$ CT1 prevented  
436 breakdown of TJ-based barrier function via a channel-independent mechanism, in Cx43-  
437 expressing epithelial cell lines derived from the retinal pigment layer (Obert et al., 2017). Three  
438 novel insights from the present study are that: 1) In addition to protecting epithelial cell barriers,  
439  $\alpha$ CT1 is protective of barrier function in endothelial cells; 2) The terminal isoleucine of  $\alpha$ CT1, and  
440 thus maintenance of the peptide's high affinity interaction with the PDZ2 domain of ZO1, appears

441 to be required for barrier protective properties in the models studied; and 3) The inhibitory effect  
442 of  $\alpha$ CT1 on actin remodeling in response to a stressor such as thrombin appears to be central to  
443 the activity of the peptide in barrier function protection.

444 A major finding of this study is that  $\alpha$ CT1 inhibits thrombin-induced attenuation of cortical actin  
445 and F-actin stress fiber formation. In intact endothelial barriers, cortical actin, in association with  
446 junctional complexes, exert outward directed tension between cells, in dynamic balance with  
447 opposing inward contractile forces within cells. The actin stress fiber phenotype induced by  
448 thrombin shifts the balance of forces within and between cells resulting in a disruption of cell  
449 contacts, formation of extracellular gaps and breakdown of barrier properties (Aslam et al., 2014;  
450 Belvitch et al., 2018; Chugh & Paluch, 2018; Escribano et al., 2019; Shakhov, Dugina, & Alieva,  
451 2019 – see also Figure 11). In addition to thrombin, numerous other chemical and physical  
452 stressors, including histamine, lipopolysaccharide, endotoxin, Tissue Necrosis Factor (TNF), and  
453 shear stress, cause similar shifts in the balance of intra- and intercellular forces, together with  
454 loss of barrier patency via the same actinomyosin-based mechanism. For example, Mehta and  
455 colleagues (2002) showed that pretreating Human Pulmonary Artery Endothelial Cells (HPAEC)  
456 with latrunculin-A (Lat-A), a toxin known to prevent F-actin assembly, inhibited thrombin-induced  
457 endothelial cell retraction and decreased loss of transepithelial electrical resistance  
458 (TEER) (Mehta et al., 2002). Pertinent to the current study, a report by Chen and colleagues  
459 (2015) found that  $\alpha$ CT1 produced derangement of cytoskeletal fibers when applied to brain  
460 endothelial cells, including formation of cytoplasmic actin-rich node-like structures (Chen et al.,  
461 2015). Interestingly, the authors also reported that these results could be recapitulated by over-

462 expressing a PDZ2 domain-deleted ZO1 mutant, suggesting that the Cx43-binding domain of ZO1  
463 targeted by  $\alpha$ CT1 was necessary for the observed effects on actin cytoskeleton organization.

464 We have previously demonstrated that pre-treatment with either  $\alpha$ CT1 or  $\alpha$ CT1-I can reduce the  
465 severity of myocardial ischemia-reperfusion (IR) injury (Jiang et al., 2019). These results in  
466 myocardium stand in contrast to the apparent mechanism of the selective vascular endothelial  
467 barrier protective effect of  $\alpha$ CT1 characterized herein. The shared myocardial protective effect  
468  $\alpha$ CT1 and  $\alpha$ CT1-I occurs independent of ZO1 interaction, and is correlated with negatively  
469 charged sequences common to both peptides, which mediate binding to the H2 domain of Cx43  
470 (Jiang et al., 2019). The severity of heart IR injuries is thought in part to be determined by levels  
471 of activation of myocardial Cx43 hemichannels (Marsh, Williams, Pridham, & Gourdie, 2021;  
472 Schulz et al., 2015) and we have previously proposed that reductions in channel activity  
473 associated with targeting the Cx43 H2 domain could account for the cardioprotective effects  
474 elicited by  $\alpha$ CT1 and  $\alpha$ CT1-I. (Jiang et al., 2019). By contrast, increased trans-epithelial  
475 permeability in endothelial monolayers subject to a thrombin insult, as studied herein, seems to  
476 be primarily mediated via effects on actin organization and shifts in forces exerted on intercellular  
477 contacts downstream of this remodeling of the cytoskeleton (Aslam et al., 2014; Vouret-Craviari,  
478 Boquet, Pouysségur, & Van Obberghen-Schilling, 1998) Actin's propensity to interact with ZO1,  
479 or membrane bound actin-binding ZO1 partners such as cytoplasmic components of adheren  
480 junctions (e.g.  $\alpha$ -catenin (Maiers et al., 2013)), and its capacity to form and align stress fibers,  
481 appears to be sensitive to a  $\alpha$ CT1-induced modulation of ZO1 following exposure of cells to  
482 thrombin. That  $\alpha$ CT1 treatment resulted in altered patterns of actin cytoskeleton remodeling,

483 and in particular to that of cortical actin at the cell periphery, is also consistent with thrombin's  
484 well-established mode-of-action on vascular permeability (Bogatcheva, Garcia, & Verin, 2002).  
485 Our results indicate that  $\alpha$ CT1 inhibits a thrombin-induced reversal of cell orientation,  
486 pronouncedly attenuating cell orientation bias in a ZO1 interaction-associated manner, while  
487 enhancing ZO1 localization at cell boundaries. Cell orientation distribution has been linked to  
488 actin-mediated ZO1-associated barrier integrity in a pioneering study carried out by Fan and  
489 colleagues (Fan et al., 2018). These authors determined that endothelial barrier disruption  
490 triggered by a PKC activator IndoV, correlated to reduced ZO1 expression and actin-dependent  
491 reversal of cell orientation. Skewness measurements of cell orientation undertaken in our study  
492 indicate that thrombin shifts the distribution of cell orientation from one side of a normal  
493 distribution to the other. While the analysis in the present study was not carried using a well-  
494 defined reference axis based on the tangential direction of a micro-patterned circular array as in  
495 the study by Fan and co-workers (Fan et al., 2018), our skewness results are consistent with their  
496 observations. Ongoing studies may usefully focus on if and how Cx43 and Cx43/ZO1 interactions  
497 may operate in this context, potentially contributing to the handedness of actin cytoskeletal and  
498 cell orientation responses.

499 In the current study,  $\alpha$ CT1 maintained F-actin at the cell periphery under thrombin stimulation,  
500 while at the same time augmenting the border localization of Cx43, ZO1, and VE-Cadherin. It is  
501 well established that stabilization of barrier function is often marked by restoration of AJ and TJ  
502 proteins to cell-cell borders (Radeva & Waschke, 2018; Riesen, Rothen-Rutishauser, & Wunderli-  
503 Allenspach, 2002). Furthermore, multiple studies have demonstrated cell-cell adhesive roles for  
504 Cx43 GJ (Cotrina et al., 2008; Elias et al., 2007; Lin et al., 2002), and the upregulation of GJ Cx43

505 has been shown to promote a stabilization of cortical actin (Francis et al., 2011; Kameritsch et al.,  
506 2015; Xu et al., 2006). Under normal conditions, cortical actin promotes the stability of cell-cell  
507 interactions by tethering these junctional structures (E.g. GJ, TJ, AJ) with other intracellular  
508 components (García-Ponce, Citalán-Madrid, Velázquez-Avila, Vargas-Robles, & Schnoor, 2015;  
509 Rodgers, Beam, Anderson, & Fanning, 2013). Taken together, our data suggests that  $\alpha$ CT1  
510 protects barrier function first and foremost, by inhibiting a shift in F-actin away from cell-to-cell  
511 contacts, thereby stabilizing transcellular interacting proteins, VE-Cadherin and Cx43, and the TJ-  
512 scaffolding protein ZO1. Figure 11 provides a model of how  $\alpha$ CT1 pretreatment could enhance  
513 outward directed tension and minimize inward directed pulling forces via modulation of actin  
514 and junctional protein distribution, with downstream effects on endothelial gap formation and  
515 barrier permeability.

516 Further insight into  $\alpha$ CT1's mechanism can be gained from the literature on the role of  
517 sphingolipid, Sphingosine-1-phosphate (S1P) in barrier modulation. A report by Want et al using  
518 atomic force microscopy showed that thrombin caused a decrease in cortical actin, concomitant  
519 with a drop in cell stiffness at the cell border, while S1P had opposite effects (Wang et al., 2015).  
520 Moreover, Lee and colleagues (Lee et al., 2006) demonstrated that in association with barrier  
521 function stabilization as measured by ECIS, S1P stimulation caused a redistribution of ZO1 and  
522 Claudin-5 to cell-cell contacts, and enhanced border colocalizations of ZO1/ cortactin and ZO1/ $\alpha$ -  
523 catenin in Human Umbilical Vein Endothelial Cells(HUVEC). While no known direct interaction  
524 between S1P and ZO1 has been identified to date, we speculate that the CT of Cx43 (either  
525 endogenous or exogenously applied in the form of  $\alpha$ CT1) and S1P, may share a similar mode-of-  
526 action in modulating ZO1/actin-mediated effects on endothelial barrier function.



527 In addition to utility of  $\alpha$ CT1 as a tool for addressing basic research questions about the potential  
528 role of Cx43 CT in barrier function, the therapeutic potential of this peptide in the treatment of  
529 vascular edema could be considerable.  $\alpha$ CT1 has undergone clinical testing in humans for a  
530 number of skin-related disease indications, including in healing of chronic wounds, where  
531 swelling and edema, and thus disrupted barrier function, are well characterized aspects of  
532 pathology (Ghatnekar, Grek, Armstrong, Desai, & Gourdie, 2015; Grek et al., 2017; Grek et al.,  
533 2015; Montgomery, Ghatnekar, Grek, Moyer, & Gourdie, 2018). In the present study,  $\alpha$ CT1  
534 pronouncedly attenuated vascular leak in Langendorff-perfused mouse hearts. For a large set of  
535 disorders (e.g. sepsis, ischemia-reperfusion (IR) injury, major trauma, organ transplantation) and  
536 tissue types, organ dysfunction and patient outcomes associates with microvascular dysfunction  
537 and edema (Chistiakov, Orekhov, & Bobryshev, 2015; G. Heusch, 2016). In other studies, we have  
538 also linked edema, such as that occurs following injury to the heart, to increased propensity to  
539 develop deadly arrhythmias (Veeraraghavan et al., 2015; 2018). Given the findings from the  
540 present study,  $\alpha$ CT1 might be considered a potential vascular-targeting, anti-edema treatment  
541 strategy for cardiovascular injury and other diseases in which edematous accumulation is  
542 detrimental. Thus, future work might investigate whether or not the ability of  $\alpha$ CT1 to inhibit of  
543 vascular leakage within the heart, extends to vascular barrier protection in other tissues/organs.  
544

## 545 **Materials and Methods**

### 546 **Test Reagents**

547 Peptides Biotin-  $\alpha$ CT1 (Biotin-RQPKIWFPNRRKPWKK-RPRPDDLEI), Biotin- $\alpha$ CT1-I (Biotin-  
548 RQPKIWFPNRRKPWKK RPRPDDLE), and Biotin-ANT (Biotin-RQPKIWFPNRRKPWK), were  
549 synthesized and quality checked for fidelity and purity using high-performance liquid  
550 chromatography and mass spectrometry (LifeTein, Hillsborough, NJ). Thrombin was purchased  
551 from Millipore Sigma (Burlington, MA Cat: T7513)

552 **FITC-dextran extravasation:** Langendorff-perfused mouse hearts were perfused for 20  
553 minutes with Tyrode's solution with or without  $\alpha$ CT1 (100uM), followed by 40 minutes with  
554 thrombin (1.5U/ml). FITC-dextran (10 mg/ml) was added to the final 10 ml of perfusate. Perfused  
555 hearts were then cryopreserved as described above and extravasated FITC-dextran levels  
556 assessed by confocal microscopy of cryosections.

### 557 **Impedance measurement using ECIS**

558 The barrier integrity of HMEC-1 (CDC, Atlanta, GA) was measuring using ECIS Z Theta system  
559 (Applied Biophysics, Troy, NY). HMEC-1 monolayers with a seeding density of  $7.50 \times 10^4$  cells/cm<sup>2</sup>  
560 were grown to confluence (24-72 h) on collagen I coated 8 W 10E+ electrodes. After cell  
561 sedimentation and attachment to the electrode surface within 30 min at room temperature, the  
562 8-well arrays were placed inside the ECIS<sup>®</sup> device for impedance monitoring. All ECIS<sup>®</sup>  
563 measurements were analyzed at an AC frequency of 32 kHz, which was identified as the most  
564 sensitive frequency for this cell type ( e.g. frequency at which maximum difference between cell-  
565 containing and cell-free measurements was achieved), each well measured every 2-4 minutes.

566 1h prior to treatment, media was exchanged with 360 $\mu$ L fresh media. Test reagents were diluted  
567 in pre-warmed medium. 20 $\mu$ L peptide/media solution (  $\alpha$ CT1,  $\alpha$ CT1-, ANT) was added to a final  
568 concentration of 100 $\mu$ M. Cells incubated in peptide for 1 hr, then 20 $\mu$ L thrombin/FBS-free media  
569 solution was added to a final concentration of 0.5U/mL. Approximately 5 min following thrombin  
570 addition, peptide-induced barrier function protection was calculated as the percentage of barrier  
571 protection from thrombin disruption= $[(\text{ohmic resistance peptide} - \text{ohmic resistance of thrombin}) / (\text{ohmic}$   
572  $\text{resistance thrombin} - \text{ohmic resistance vehicle control})] \times 100\%$ . The effects of peptides alone on barrier  
573 function were calculated as the change in ohmic resistance compared to vehicle control (ohmic resistance  
574 peptide-ohmic resistance vehicle).

### 575 **Macromolecular permeability (MP)**

576 Macromolecular permeability (MP) filter inserts (pore size 0.4  $\mu$ m, 12 mm diameter) (Falcon,  
577 Corning, NY; Cat:353095) were coated with collagen I (Corning, Corning, NY; Cat: 354246) at  
578 2 $\mu$ g/mL in 0.02N acetic acid. Subsequently, the lower compartments of 24W Transwell chambers  
579 (Falcon, Corning, NY; Cat: 353504,) were filled with 700 $\mu$ L HMEC-1 media. HMEC-1 cells  
580 suspended in 300  $\mu$ l media ( $7.50 \times 10^4$  cells/cm<sup>2</sup>) were seeded on the upper compartment. They  
581 were grown to confluence (48–96 h). Cells were treated as indicated in the ECIS experiments( see  
582 above). At 55 min after peptide addition, 4 $\mu$ L 100mg/mL FITC-dextran/H<sub>2</sub>O solution was added  
583 to wells. 150microl of basolateral media was collected for time 0. Thrombin was added to  
584 experimental wells to final concentration of 1.5U/mL, 5 min after the application of FITC-dextran.  
585 150  $\mu$ l samples were taken after 5, 10, 15, 20 min from the lower compartment. The removed  
586 volume was immediately replaced by fresh medium. To evenly disperse FITC-dextran within the  
587 media, transwell plates were gently shaken. Fluorescence (ex: 485 nm; em: 535 nm) was

588 measured with a fluorescence plate reader. Data are expressed as relative changes in  
589 fluorescence compared to vehicle permeability. P (cm/s) was calculated by the following  
590 equation(Bischoff et al., 2016).

$$P = \frac{[C(t) - C(t_0)] \cdot V}{A \cdot t \cdot C_0}$$

591  
592 C(t) is the concentration ( $\mu\text{g/ml}$ ) of FITC-dextran in the samples that were taken from the lower  
593 compartment after 5, 10, 15, 20 min, C(t<sub>0</sub>) is the FITC dextran concentration ( $\mu\text{g/ml}$ ) of the  
594 samples taken after 0 min, t is the duration of the flux (s), V is the volume ( $\text{cm}^3$ ) in the lower  
595 compartment, A is the surface of the Transwell membrane ( $\text{cm}^2$ ) and C<sub>0</sub> is the initial  
596 concentration ( $\mu\text{g/ml}$ ) of the tracer on the donor side. The concentration of FITC-dextran in each  
597 sample was determined by reference to a FITC-dextran standard curve.

### 598 **Proximity Ligation Assay**

599 The peptide/ZO1 interaction was detected *in situ* using the Duolink secondary antibodies and  
600 detection kit (Sigma, St Louis, MO, Cat: 92002, 92004) according to manufacturer instructions.  
601 Primary antibodies against Cx43 (South San Francisco, CA; Cat: SC6560) and biotin (Invitrogen,  
602 Carlsbad, CA ; Cat: 617-300) were applied under standard conditions. Duolink secondary  
603 antibodies against the primary antibodies were then added. These secondary antibodies were  
604 provided as conjugates to oligonucleotides that when within close proximity(< 40nm; ; Gullberg,  
605 2010) were ligated together Duolink Ligation Solution. Finally, polymerase was added, to trigger  
606 closed circle rolling amplification(which amplified any existing closed circles) and detection was  
607 achieved with complementary, fluorescently labeled oligonucleotides.

608 Confocal images were acquired on a TCS SP8 laser scanning confocal microscope (LSCM)  
609 equipped with a 63×/1.4 numerical aperture (NA) oil objective (Leica, Buffalo Grove, IL). Imaging  
610 processing and quantitative image analysis of Duolink signal was done using Cell Profiler (MIT,  
611 Cambridge, MA). An intensity threshold was applied, then object clusters between 2 and 50 pixels  
612 in diameter were identified as Duolink Objects, then compared to original signal for validation.  
613 These Duolink objects were then counted and normalized to the number of nuclei in the images,  
614 and these values were normalized again to No Peptide Control.

### 615 **Immunostaining and Quantitative Image Analysis**

616 For peptide uptake experiments (Figure 1), Cx43-deficient MDCK monolayers were treated with  
617 peptide for 1 hr, then cells were washed with DPBS w/Ca<sup>2+</sup> and Mg<sup>2+</sup>, then fixed with 4%  
618 paraformaldehyde. The biotin portion of the peptides were labeled with Streptavidin, Alexa Fluor  
619 647 (Invitrogen, Carlsbad, CA ; Cat: S21374). ZO1 was detected with Rb A-ZO1 (Zymed, South San  
620 Francisco, CA; Cat: 61-7300) and Chicken A-Rb 488 (Life Technology, Carlsbad, CA; Cat: A21441).  
621 Actin was labeled in HDMEC, grown to confluence on transwell filters (Promocell, Heidelberg,  
622 Germany) by Alexa Fluor 647 phalloidin (Invitrogen, Carlsbad, CA; Cat: A22287)(Figure 3).  
623 Colocalization analysis was done by isolated border ZO1 pixels and calculation Pearson  
624 correlation coefficient with peptide biotin signal. For the distribution of cell orientations in  
625 HDMECs, absolute skewness measurements were calculated as the absolute value of  $g_1$ = the  
626 average value of  $z^3$ , where  $z$  is the familiar z-score,  $z = (x-\bar{x})/\sigma$ , where  $x$  is the individual cell angle  
627 with respect to a 0° angle reference axis. Quantitative Image Analysis of F-actin, VE-Cadherin,  
628 ZO1, and Cx43 was done using Cell Profiler (MIT, Cambridge, MA) (McQuin et al., 2018). For a  
629 given cell within a monolayer selected at random to be quantified, a mask based on

630 immunolabeling signals was created in Cell Profiler. Then, the radial distribution of relative F-  
631 actin, Cx43, ZO1 or VE-Cadherin labeling levels were measured from the cell center to the cell  
632 border in 20 successive sub-regions. The sub-regions were each ~1-1.5  $\mu\text{m}$  width. Normalized  
633 fractional intensity for each sub-region was calculated as a fraction of total intensity normalized  
634 by fraction of pixels at a given radius. Means at each cell location were then estimated in R Studio  
635 (R Core Team, 2021) by employing a General Linear Model with Random Effects to account for  
636 the variability within each cell location. 95% confidence intervals for each treatment mean at  
637 each cell location were then calculated.

### 638 **Statistics**

639 All data from at least three independent experiments are presented as mean  $\pm$  standard error of  
640 the mean (Alonso et al.). Statistical significance was evaluated using GraphPad Prism (version 8.3,  
641 GraphPad Prism, San Diego, USA) and assessed by one-way ANOVA and post-hoc tests properly  
642 corrected for multiple comparisons where applicable. For protein radial distribution statistics, a  
643 General Linear Model with Random Effects was utilized in R Studio, (R Core Team, 2021) and  
644 estimated means from the model were calculated with 95% confidence intervals. Significant  
645 differences between treatments groups and thrombin treatment alone were reported in Tables  
646 1 and 2. A Kolmogorov–Smirnov (KS) test on cell orientation data was performed to confirm the  
647 significance of these findings (data not shown). Significant differences were assumed at  $P \leq 0.05$ .

## 648 **Acknowledgements**

649 We would like to thank Jane Jourdan for her technical assistance with some of the experiments conducted  
650 in this manuscript. Ian Crandell(PhD) and Jennifer West(MS), are thanked for their expert guidance on a  
651 few of the statistics components of the manuscript.

## 652 **Author Contributions**

653 Conceptualization and design, experimental investigation and writing, R.E.S.; Conceptualization and  
654 design, writing—review and editing, R.G.G. Experimental contributions, LM and RV. All authors have read  
655 and agreed to the published version of the manuscript.

## 656 **Disclosures**

657 R.G.G. is a non-remunerated member of the Scientific Advisory Board of FirstString Research,  
658 which licensed alpha-carboxyl terminus 1 peptide. R.G.G. has a small ownership interest in FirstString  
659 Research Inc. (<1% of company stock). R.E.S. has no disclosures to report.

## 660 **Sources of Funding**

661 The work in the lab of R.G.G. is supported by the National Heart, Lung, and Blood Institute (NHLBI) of  
662 the National Institute of Health (NIH) under the F31 Grant HL145982 for R.E.S., as well as 2R01HL056728-  
663 18 and 5R01HL141855-03 for R.G.G.

664

665 **Supplementary Figures**

666 **Supplementary Figure 1**

667

668 A

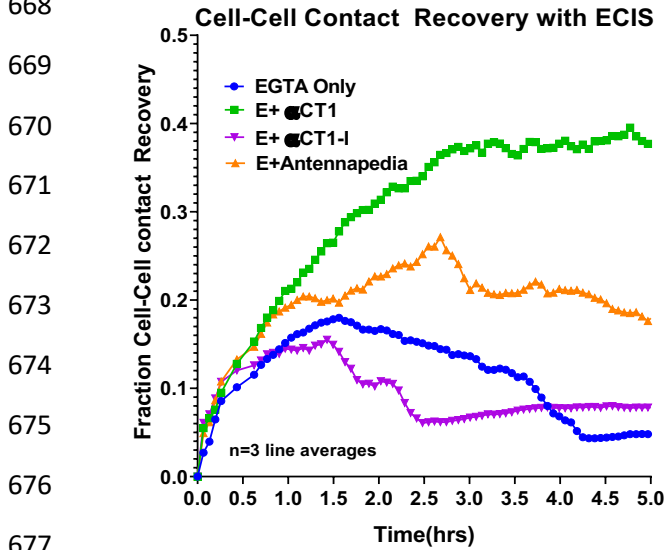

677

678

679 **Supplementary Figure 1:  $\alpha$ CT1 augments barrier function recovery in Cx43-deficient MDCK cells**

680 **A)** Summary ECIS time course data of barrier function recovery calculated as fraction of barrier

681 function recovery, normalized to the difference between baseline and time points of maximal

682 disruption. **B)** Quantification of area under the curve analysis of barrier function recovery across

683 5 hour time period, applied to time course data from Figure 4A.

684

685

B

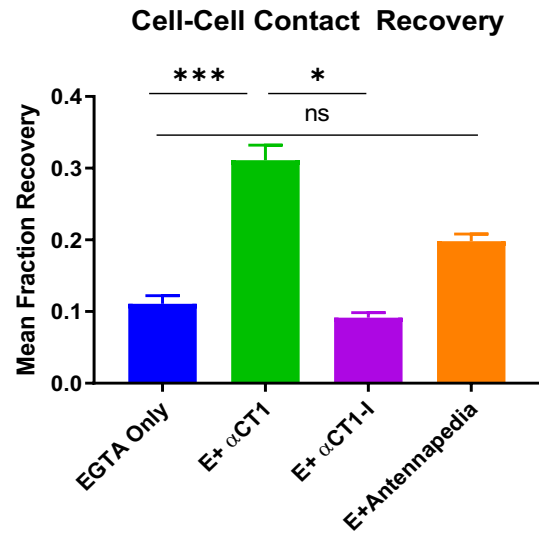



686 **Supplementary Table 1**

|                  | F-actin       |                    | VEC           |                    |
|------------------|---------------|--------------------|---------------|--------------------|
|                  | Cell Location | P<0.05 Vs Thrombin | Cell Location | P<0.05 Vs Thrombin |
| Nucleus<br>↑     | 1             | V                  | 1             | V                  |
|                  | 2             | V                  | 2             | V                  |
|                  | 3             | V                  | 3             | V                  |
|                  | 4             | V                  | 4             | V                  |
|                  | 5             | V                  | 5             | V                  |
|                  | 6             | V                  | 6             | V                  |
| Cytoplasm<br>↓   | 7             | V                  | 7             | V                  |
|                  | 8             | V                  | 8             | V                  |
|                  | 9             | V                  | 9             | V                  |
|                  | 10            | V                  | 10            | V                  |
|                  | 11            | V                  | 11            | V                  |
|                  | 12            | V                  | 12            | V                  |
|                  | 13            | V                  | 13            | V                  |
|                  | 14            | V                  | 14            | V                  |
| Cell Border<br>↓ | 15            | V                  | 15            | V                  |
|                  | 16            | V                  | 16            | V                  |
|                  | 17            | V,A1               | 17            | V,A1               |
|                  | 18            | V,A1               | 18            | V,A1               |
|                  | 19            | V,A1               | 19            | V,A1               |
|                  | 20            | V,A1               | 20            | V,A1               |

687

688 **Table 1:** Peptide treatments with significant effects compared to thrombin treatment alone in

689 HMEC-1

690 **V**=Vehicle **A1**= $\alpha$ CT1+T **A-I**=  $\alpha$ CT1-I +T

691

692 **Supplementary Table 2**

|               | F-actin            | ZO1                | Cx43               |
|---------------|--------------------|--------------------|--------------------|
| Cell Location | P<0.05 Vs Thrombin | P<0.05 Vs Thrombin | P<0.05 Vs Thrombin |
| <b>1</b>      | A1                 | A1                 | A1                 |
| <b>2</b>      | A1                 | A1                 | A1                 |
| <b>3</b>      | A1, A-I            | A1                 | A1, A-I            |
| <b>4</b>      | V, A1, A-I         | A1                 | A1, A-I            |
| <b>5</b>      | V, A1, A-I         | A1                 | A1, A-I            |
| <b>6</b>      | V, A1, A-I         | A1                 | A1, A-I            |
| <b>7</b>      | V,A1, A-I          | A1                 | A1, A-I            |
| <b>8</b>      | V,A1, A-I          | A1                 | A1, A-I            |
| <b>9</b>      | V,A1, A-I          | A1                 | A1, A-I            |
| <b>10</b>     | V,A1, A-I          | A1                 | A1, A-I            |
| <b>11</b>     | V,A1, A-I          | A1                 | A1, A-I            |
| <b>12</b>     | V,A1, A-I          | A1                 | A1                 |
| <b>13</b>     | V,A1, A-I          | A1                 | None               |
| <b>14</b>     | V,A1               | None               | None               |
| <b>15</b>     | V,A1               | None               | None               |
| <b>16</b>     | V                  | None               | None               |
| <b>17</b>     | None               | None               | None               |
| <b>18</b>     | V,A1               | None               | None               |
| <b>19</b>     | V,A1               | A1                 | A1                 |
| <b>20</b>     | V,A1               | A1                 | A1                 |

693

694 **Table 2:** Peptide treatments with significant effects compared to thrombin treatment alone in  
 695 HDMECs. **V**=Vehicle **A1**= $\alpha$ CT1+T **A-I**=  $\alpha$ CT1-I +T **ANT**= ANT +T

696 **References**

697 Aghajanian, A., Wittchen, E., Allingham, M., Garrett, T., & Burrige, K. (2008). Endothelial cell junctions  
 698 and the regulation of vascular permeability and leukocyte transmigration. *J Thromb Haemost*,  
 699 6(9), 1453-1460. doi:10.1111/j.1538-7836.2008.03087.x

700 Alonso, J., Angermeyer, M. C., Bernert, S., Bruffaerts, R., Brugha, T. S., Bryson, H., . . . The, E. M. i. (2004).  
 701 Use of mental health services in Europe: results from the European Study of the Epidemiology of  
 702 Mental Disorders (ESEMed) project. *Acta Psychiatrica Scandinavica*, 109(s420), 47-54.  
 703 doi:10.1111/j.1600-0047.2004.00330.x

704 Aslam, M., Tanislav, C., Troidl, C., Schulz, R., Hamm, C., & Gündüz, D. (2014). cAMP controls the restoration  
 705 of endothelial barrier function after thrombin-induced hyperpermeability via Rac1 activation.  
 706 *Physiological Reports*, 2(10), e12175. doi:10.14814/phy2.12175

707 Belvitch, P., Htwe, Y. M., Brown, M. E., & Dudek, S. (2018). Cortical Actin Dynamics in Endothelial  
 708 Permeability. *Current topics in membranes*, 82, 141-195. doi:10.1016/bs.ctm.2018.09.003

709 Bischoff, I., Hornburger, M. C., Mayer, B. A., Beyerle, A., Wegener, J., & Fürst, R. (2016). Pitfalls in assessing  
 710 microvascular endothelial barrier function: impedance-based devices versus the classic  
 711 macromolecular tracer assay. *Scientific Reports*, 6(1), 23671. doi:10.1038/srep23671

- 712 Breslin, J. W., Zhang, X. E., Worthylake, R. A., & Souza-Smith, F. M. (2015). Involvement of local  
713 lamellipodia in endothelial barrier function. *PLoS One*, 10(2), e0117970.  
714 doi:10.1371/journal.pone.0117970
- 715 BurrIDGE, K., & Wittchen, E. S. (2013). The tension mounts: stress fibers as force-generating  
716 mechanotransducers. *J Cell Biol*, 200(1), 9-19. doi:10.1083/jcb.201210090
- 717 Chen, C. H., Mayo, J. N., Gourdie, R. G., Johnstone, S. R., Isakson, B. E., & Bearden, S. E. (2015). The  
718 connexin 43/ZO-1 complex regulates cerebral endothelial F-actin architecture and migration. In  
719 *American journal of physiology. Cell physiology* (Vol. 309, pp. C600-607).
- 720 Chistiakov, D. A., Orekhov, A. N., & Bobryshev, Y. V. (2015). Endothelial Barrier and Its Abnormalities in  
721 Cardiovascular Disease. *Front Physiol*, 6. doi:10.3389/fphys.2015.00365
- 722 Chugh, P., & Paluch, E. K. (2018). The actin cortex at a glance. *Journal of Cell Science*, 131(14), jcs186254.  
723 doi:10.1242/jcs.186254
- 724 Cotrina, M. L., Lin, J. H.-C., & Nedergaard, M. (2008). Adhesive properties of connexin hemichannels. *Glia*,  
725 56(16), 1791-1798. doi:10.1002/glia.20728
- 726 Derangeon, M., Spray, D. C., Bourmeyster, N., Sarrouilhe, D., & Hervé, J.-C. (2009). Reciprocal influence of  
727 connexins and apical junction proteins on their expressions and functions. *Biochimica et*  
728 *Biophysica Acta (BBA) - Biomembranes*, 1788(4), 768-778.  
729 doi:https://doi.org/10.1016/j.bbamem.2008.10.023
- 730 Doggett, T. M., & Breslin, J. W. (2011). Study of the actin cytoskeleton in live endothelial cells expressing  
731 GFP-actin. *J Vis Exp*(57). doi:10.3791/3187
- 732 Elias, L. A., Wang, D. D., & Kriegstein, A. R. (2007). Gap junction adhesion is necessary for radial migration  
733 in the neocortex. *Nature*, 448(7156), 901-907. doi:10.1038/nature06063
- 734 Escribano, J., Chen, M. B., Moendarbary, E., Cao, X., Shenoy, V., Garcia-Aznar, J. M., . . . Spill, F. (2019).  
735 Balance of mechanical forces drives endothelial gap formation and may facilitate cancer and  
736 immune-cell extravasation. *PLoS Computational Biology*, 15(5), e1006395.  
737 doi:10.1371/journal.pcbi.1006395
- 738 Fan, J., Ray, P., Lu, Y. W., Kaur, G., Schwarz, J. J., & Wan, L. Q. (2018). Cell chirality regulates intercellular  
739 junctions and endothelial permeability. *Science Advances*, 4(10), eaat2111.  
740 doi:10.1126/sciadv.aat2111
- 741 Francis, R., Xu, X., Park, H., Wei, C. J., Chang, S., Chatterjee, B., & Lo, C. (2011). Connexin43 modulates cell  
742 polarity and directional cell migration by regulating microtubule dynamics. *PLoS One*, 6(10),  
743 e26379. doi:10.1371/journal.pone.0026379
- 744 Garcia, J. G. (2009). Concepts in microvascular endothelial barrier regulation in health and disease.  
745 *Microvasc Res*, 77(1), 1-3. doi:10.1016/j.mvr.2009.01.001
- 746 Ghatnekar, G. S., Grek, C. L., Armstrong, D. G., Desai, S. C., & Gourdie, R. G. (2015). The effect of a  
747 connexin43-based Peptide on the healing of chronic venous leg ulcers: a multicenter, randomized  
748 trial. *J Invest Dermatol*, 135(1), 289-298. doi:10.1038/jid.2014.318
- 749 Giepmans, B. N. (2004). Gap junctions and connexin-interacting proteins. *Cardiovasc Res*, 62(2), 233-245.  
750 doi:10.1016/j.cardiores.2003.12.009

- 751 Giepmans, B. N. G., & Moolenaar, W. H. (1998). The gap junction protein connexin43 interacts with the  
752 second PDZ domain of the zona occludens-1 protein. *Current Biology*, 8(16), 931-934.  
753 doi:[http://dx.doi.org/10.1016/S0960-9822\(07\)00375-2](http://dx.doi.org/10.1016/S0960-9822(07)00375-2)
- 754 Grek, C. L., Montgomery, J., Sharma, M., Ravi, A., Rajkumar, J. S., Moyer, K. E., . . . Ghatnekar, G. S. (2017).  
755 A Multicenter Randomized Controlled Trial Evaluating a Cx43-Mimetic Peptide in Cutaneous  
756 Scarring. *J Invest Dermatol*, 137(3), 620-630. doi:10.1016/j.jid.2016.11.006
- 757 Grek, C. L., Prasad, G. M., Viswanathan, V., Armstrong, D. G., Gourdie, R. G., & Ghatnekar, G. S. (2015).  
758 Topical administration of a connexin43-based peptide augments healing of chronic neuropathic  
759 diabetic foot ulcers: A multicenter, randomized trial. *Wound Repair Regen*, 23(2), 203-212.  
760 doi:10.1111/wrr.12275
- 761 Herrero, R., Sanchez, G., & Lorente, J. A. (2017). New insights into the mechanisms of pulmonary edema  
762 in acute lung injury. *Ann Transl Med*, 6(2), 11.
- 763 Hervé, J. C., Bourmeyster, N., Sarrouilhe, D., & Duffy, H. S. (2007). Gap junctional complexes: from partners  
764 to functions. *Prog Biophys Mol Biol*, 94(1-2), 29-65. doi:10.1016/j.pbiomolbio.2007.03.010
- 765 Heusch, G. (2016). The Coronary Circulation as a Target of Cardioprotection.  
766 doi:10.1161/CIRCRESAHA.116.308640
- 767 Heusch, G. (2016). The Coronary Circulation as a Target of Cardioprotection. *Circ Res*, 118(10), 1643-1658.  
768 doi:10.1161/circresaha.116.308640
- 769 Heusch, G. (2018). Protection of the human coronary circulation by remote ischemic conditioning.  
770 *International Journal of Cardiology*, 252, 35-36. doi:<https://doi.org/10.1016/j.ijcard.2017.11.044>
- 771 Higashi, T., & Miller, A. L. (2017). Tricellular junctions: how to build junctions at the TRICkiest points of  
772 epithelial cells. *Mol Biol Cell*, 28(15), 2023-2034. doi:10.1091/mbc.E16-10-0697
- 773 Hunter, A. W., Barker, R. J., Zhu, C., & Gourdie, R. G. (2005). Zonula Occludens-1 Alters Connexin43 Gap  
774 Junction Size and Organization by Influencing Channel Accretion. *Mol Biol Cell*, 16(12), 5686-5698.  
775 doi:10.1091/mbc.e05-08-0737
- 776 Jackson, S. P., Darbousset, R., & Schoenwaelder, S. M. (2019). Thromboinflammation: challenges of  
777 therapeutically targeting coagulation and other host defense mechanisms. *Blood*, 133(9), 906-  
778 918. doi:10.1182/blood-2018-11-882993
- 779 Jiang, J., Hoagland, D., Palatinus, J. A., He, H., Iyyathurai, J., Jourdan, L. J., . . . Gourdie, R. G. (2019).  
780 Interaction of alpha Carboxyl Terminus 1 Peptide With the Connexin 43 Carboxyl Terminus  
781 Preserves Left Ventricular Function After Ischemia-Reperfusion Injury. *J Am Heart Assoc*, 8(16),  
782 e012385. doi:10.1161/jaha.119.012385
- 783 Kameritsch, P., Kiemer, F., Beck, H., Pohl, U., & Pogoda, K. (2015). Cx43 increases serum induced filopodia  
784 formation via activation of p21-activated protein kinase 1. *Biochimica et Biophysica Acta (BBA) -*  
785 *Molecular Cell Research*, 1853(11, Part A), 2907-2917.  
786 doi:<https://doi.org/10.1016/j.bbamcr.2015.08.004>
- 787 Kameritsch, P., Pogoda, K., & Pohl, U. (2012). Channel-independent influence of connexin 43 on cell  
788 migration. *Biochimica et Biophysica Acta (BBA) - Biomembranes*, 1818(8), 1993-2001.  
789 doi:<https://doi.org/10.1016/j.bbamem.2011.11.016>

- 790 Komarova, Y., & Malik, A. B. (2010). Regulation of endothelial permeability via paracellular and  
791 transcellular transport pathways. *Annu Rev Physiol*, 72, 463-493. doi:10.1146/annurev-physiol-  
792 021909-135833
- 793 Lee, J. F., Zeng, Q., Ozaki, H., Wang, L., Hand, A. R., Hla, T., . . . Lee, M. J. (2006). Dual roles of tight junction-  
794 associated protein, zonula occludens-1, in sphingosine 1-phosphate-mediated endothelial  
795 chemotaxis and barrier integrity. *J Biol Chem*, 281(39), 29190-29200.  
796 doi:10.1074/jbc.M604310200
- 797 Leithe, E., Mesnil, M., & Aasen, T. (2018). The connexin 43 C-terminus: A tail of many tales. *Biochim*  
798 *Biophys Acta*, 1860(1), 48-64. doi:10.1016/j.bbamem.2017.05.008
- 799 Lin, J. H., Takano, T., Cotrina, M. L., Arcuino, G., Kang, J., Liu, S., . . . Nedergaard, M. (2002). Connexin 43  
800 enhances the adhesivity and mediates the invasion of malignant glioma cells. *J Neurosci*, 22(11),  
801 4302-4311. doi:10.1523/jneurosci.22-11-04302.2002
- 802 Maass, K., Ghanem, A., Kim, J. S., Saathoff, M., Urschel, S., Kirfel, G., . . . Willecke, K. (2004). Defective  
803 Epidermal Barrier in Neonatal Mice Lacking the C-Terminal Region of Connexin43<sup>BDM</sup>. In *Mol Biol*  
804 *Cell* (Vol. 15, pp. 4597-4608).
- 805 Maiers, J. L., Peng, X., Fanning, A. S., & DeMali, K. A. (2013). ZO-1 recruitment to  $\alpha$ -catenin--a novel  
806 mechanism for coupling the assembly of tight junctions to adherens junctions. *Journal of Cell*  
807 *Science*, 126(Pt 17), 3904-3915. doi:10.1242/jcs.126565
- 808 Marsh, S. R., Williams, Z. J., Pridham, K. J., & Gourdie, R. G. (2021). Peptidic Connexin43 Therapeutics in  
809 Cardiac Reparative Medicine. *Journal of cardiovascular development and disease*, 8(5), 52.  
810 doi:10.3390/jcdd8050052
- 811 Matsuuchi, L., & Naus, C. C. (2013). Gap junction proteins on the move: Connexins, the cytoskeleton and  
812 migration. *Biochimica et Biophysica Acta (BBA) - Biomembranes*, 1828(1), 94-108.  
813 doi:https://doi.org/10.1016/j.bbamem.2012.05.014
- 814 McQuin, C., Goodman, A., Chernyshev, V., Kamensky, L., Cimini, B. A., Karhohs, K. W., . . . Carpenter, A.  
815 E. (2018). CellProfiler 3.0: Next-generation image processing for biology. *PLoS Biol*, 16(7),  
816 e2005970. doi:10.1371/journal.pbio.2005970
- 817 Mehta, D., Tiruppathi, C., Sandoval, R., Minshall, R. D., Holinstat, M., & Malik, A. B. (2002). Modulatory  
818 role of focal adhesion kinase in regulating human pulmonary arterial endothelial barrier function.  
819 *The Journal of Physiology*, 539(Pt 3), 779-789. doi:10.1113/jphysiol.2001.013289
- 820 Mezache L, Struckman HL, Greer-Short A, Baine S, Györke S, Radwański PB, Hund TJ, Veeraraghavan R.  
821 (2020). Vascular endothelial growth factor promotes atrial arrhythmias by inducing acute  
822 intercalated disk remodeling. *Sci Rep*. 10:20463. doi: 10.1038/s41598-020-77562-5.
- 823 Montgomery, J., Ghatnekar, G. S., Grek, C. L., Moyer, K. E., & Gourdie, R. G. (2018). Connexin 43-Based  
824 Therapeutics for Dermal Wound Healing. *Int J Mol Sci*, 19(6). doi:10.3390/ijms19061778
- 825 Obert, E., Strauss, R., Brandon, C., Grek, C., Ghatnekar, G., Gourdie, R., & Rohrer, B. (2017). Targeting the  
826 tight junction protein, zonula occludens-1, with the connexin43 mimetic peptide, alphaCT1,  
827 reduces VEGF-dependent RPE pathophysiology. *J Mol Med (Berl)*. doi:10.1007/s00109-017-1506-  
828 8

- 829 Olk, S., Zoidl, G., & Dermietzel, R. (2009). Connexins, cell motility, and the cytoskeleton. *Cell Motil*  
830 *Cytoskeleton*, 66(11), 1000-1016. doi:10.1002/cm.20404
- 831 Rabiet, M.-J., Plantier, J.-L., Rival, Y., Genoux, Y., Lampugnani, M.-G., & Dejana, E. (1996). Thrombin-  
832 Induced Increase in Endothelial Permeability Is Associated With Changes in Cell-to-Cell Junction  
833 Organization. *Arterioscler Thromb Vasc Biol*, 16(3), 488-496. doi:doi:10.1161/01.ATV.16.3.488
- 834 Radeva, M. Y., & Waschke, J. (2018). Mind the gap: mechanisms regulating the endothelial barrier. *Acta*  
835 *Physiologica*, 222(1), e12860. doi:10.1111/apha.12860
- 836 Rhett, J. M., Jourdan, J., & Gourdie, R. G. (2011). Connexin 43 connexon to gap junction transition is  
837 regulated by zonula occludens-1. In *Mol Biol Cell* (Vol. 22, pp. 1516-1528).
- 838 Riesen, F. K., Rothen-Rutishauser, B., & Wunderli-Allenspach, H. (2002). A ZO1-GFP fusion protein to study  
839 the dynamics of tight junctions in living cells. *Histochemistry and Cell Biology*, 117(4), 307-315.  
840 doi:10.1007/s00418-002-0398-y
- 841 Schulz, R., Görge, P. M., Görbe, A., Ferdinandy, P., Lampe, P. D., & Leybaert, L. (2015). Connexin 43 is an  
842 emerging therapeutic target in ischemia/reperfusion injury, cardioprotection and  
843 neuroprotection. *Pharmacol Ther*, 153, 90-106. doi:10.1016/j.pharmthera.2015.06.005
- 844 Shakhov, A. S., Dugina, V. B., & Alieva, I. B. (2019). Structural Features of Actin Cytoskeleton Required for  
845 Endotheliocyte Barrier Function. *Biochemistry (Mosc)*, 84(4), 358-369.  
846 doi:10.1134/s0006297919040035
- 847 Simmons, S., Erfinanda, L., Bartz, C., & Kuebler, W. M. (2019). Novel mechanisms regulating endothelial  
848 barrier function in the pulmonary microcirculation. *J Physiol*, 597(4), 997-1021.  
849 doi:10.1113/jp276245
- 850 Soon, A. S., Chua, J. W., & Becker, D. L. (2016). Connexins in endothelial barrier function - novel therapeutic  
851 targets countering vascular hyperpermeability. *Thromb Haemost*, 116(5), 852-867.  
852 doi:10.1160/th16-03-0210
- 853 Sorgen, P. L., Duffy, H. S., Sahoo, P., Coombs, W., Delmar, M., & Spray, D. C. (2004). Structural changes in  
854 the carboxyl terminus of the gap junction protein connexin43 indicates signaling between binding  
855 domains for c-Src and zonula occludens-1. *J Biol Chem*, 279(52), 54695-54701.  
856 doi:10.1074/jbc.M409552200
- 857 Sorgen, P. L., Trease, A. J., Spagnol, G., Delmar, M., & Nielsen, M. S. (2018). Protein-Protein Interactions  
858 with Connexin 43: Regulation and Function. *Int J Mol Sci*, 19(5). doi:10.3390/ijms19051428
- 859 Strauss, R. E., & Gourdie, R. G. (2020). Cx43 and the Actin Cytoskeleton: Novel Roles and Implications for  
860 Cell-Cell Junction-Based Barrier Function Regulation. *Biomolecules*, 10(12), 1656.  
861 doi:10.3390/biom10121656
- 862 Veeraraghavan R, Lin J, Keener JP, Gourdie RG\*, Poelzing S\*. (2015). Sodium channels in the Cx43 gap  
863 junction perinexus may constitute a cardiac ephapse: an experimental and modeling study.  
864 *Pflugers Arch*. 467(10):2093-105, doi: 10.1007/s00424-014-1675-z.
- 865
- 866 Veeraraghavan R, Hoeker GS, Alvarez-Laviada A, Hoagland D, King DR, Chen C, Isom LL, Deschenes I, Smyth  
867 JW, Gorelik J, Poelzing S, Gourdie RG. The Adhesion Function of the Sodium Channel Beta Subunit

868 (β1) is Required for Cardiac Action Potential Propagation. *eLife*. 2018 Aug 14;7. pii: 337610. doi:  
869 10.7554/eLife.37610, doi: 10.7554/eLife.37610.

870 Vouret-Craviari, V., Boquet, P., Pouysségur, J., & Van Obberghen-Schilling, E. (1998). Regulation of the  
871 actin cytoskeleton by thrombin in human endothelial cells: role of Rho proteins in endothelial  
872 barrier function. *Mol Biol Cell*, 9(9), 2639-2653. doi:10.1091/mbc.9.9.2639

873 Wang, X., Bleher, R., Brown, M. E., Garcia, J. G. N., Dudek, S. M., Shekhawat, G. S., & Dravid, V. P. (2015).  
874 Nano-Biomechanical Study of Spatio-Temporal Cytoskeleton Rearrangements that Determine  
875 Subcellular Mechanical Properties and Endothelial Permeability. *Scientific Reports*, 5(1), 11097.  
876 doi:10.1038/srep11097

877 Xu, X., Francis, R., Wei, C. J., Linask, K. L., & Lo, C. W. (2006). Connexin 43-mediated modulation of  
878 polarized cell movement and the directional migration of cardiac neural crest cells. *Development*,  
879 133(18), 3629-3639. doi:10.1242/dev.02543

880 Zihni, C., Mills, C., Matter, K., & Balda, M. S. (2016). Tight junctions: from simple barriers to multifunctional  
881 molecular gates. *Nat Rev Mol Cell Biol*, 17(9), 564-580. doi:10.1038/nrm.2016.80

882 **R Studio:**

883 R Core Team (2021). R: A language and environment for statistical computing. R Foundation for Statistical  
884 Computing, Vienna, Austria. URL <https://www.R-project.org/>

885
